# Supplementary material
Source: PubMed Central journal article supplement (PMC3192247)
Supplement: NIHMS309529-supplement-1.pdf [file NIHMS309529-supplement-1.pdf]

## Supplement

### **Somatic deletions of genes regulating MSH2 protein stability cause DNA mismatch repair deficiency and drug resistance in human leukemia cells.**

Barthelemy Diouf<sup>1,2</sup>, Qing Cheng<sup>1,2</sup>, Natalia F. Krynetskaia<sup>1,2</sup>, Wenjian Yang<sup>1,2</sup>, Meyling Cheok<sup>1,2</sup>, Deqing Pei<sup>1,3</sup>, Yiping Fan<sup>4</sup>, Cheng Cheng<sup>1,3</sup>, Evgeny Y. Krynetskiy<sup>1,2</sup>, Hui Geng<sup>5</sup>, Siying Chen<sup>5</sup>, William Thierfelder<sup>1,2</sup>, Charles G. Mullighan<sup>1,6</sup>, James Downing<sup>1,6</sup>, Peggy Hsieh<sup>5</sup>, Ching-Hon Pui<sup>1,3,7</sup>, Mary V. Relling<sup>1,2</sup> and William E. Evans<sup>1,2</sup> \*

<sup>1</sup>Hematological Malignancies Program, and

<sup>2</sup>Departments of Pharmaceutical Sciences, <sup>6</sup>Pathology, <sup>3</sup>Biostatistics,

<sup>7</sup>Oncology, and <sup>4</sup>Hartwell Center for Bioinformatics and Biotechnology, St. Jude Children's Research Hospital, Memphis, TN 38105

<sup>5</sup>Genetics & Biochemistry Branch, National Institute of Diabetes and Digestive and Kidney Diseases, NIH, Bethesda, MD 20892.

\*Correspondence: [william.evans@stjude.org](mailto:william.evans@stjude.org)

## Supplement

Supplementary Figures and Tables

Supplementary Methods and Procedures

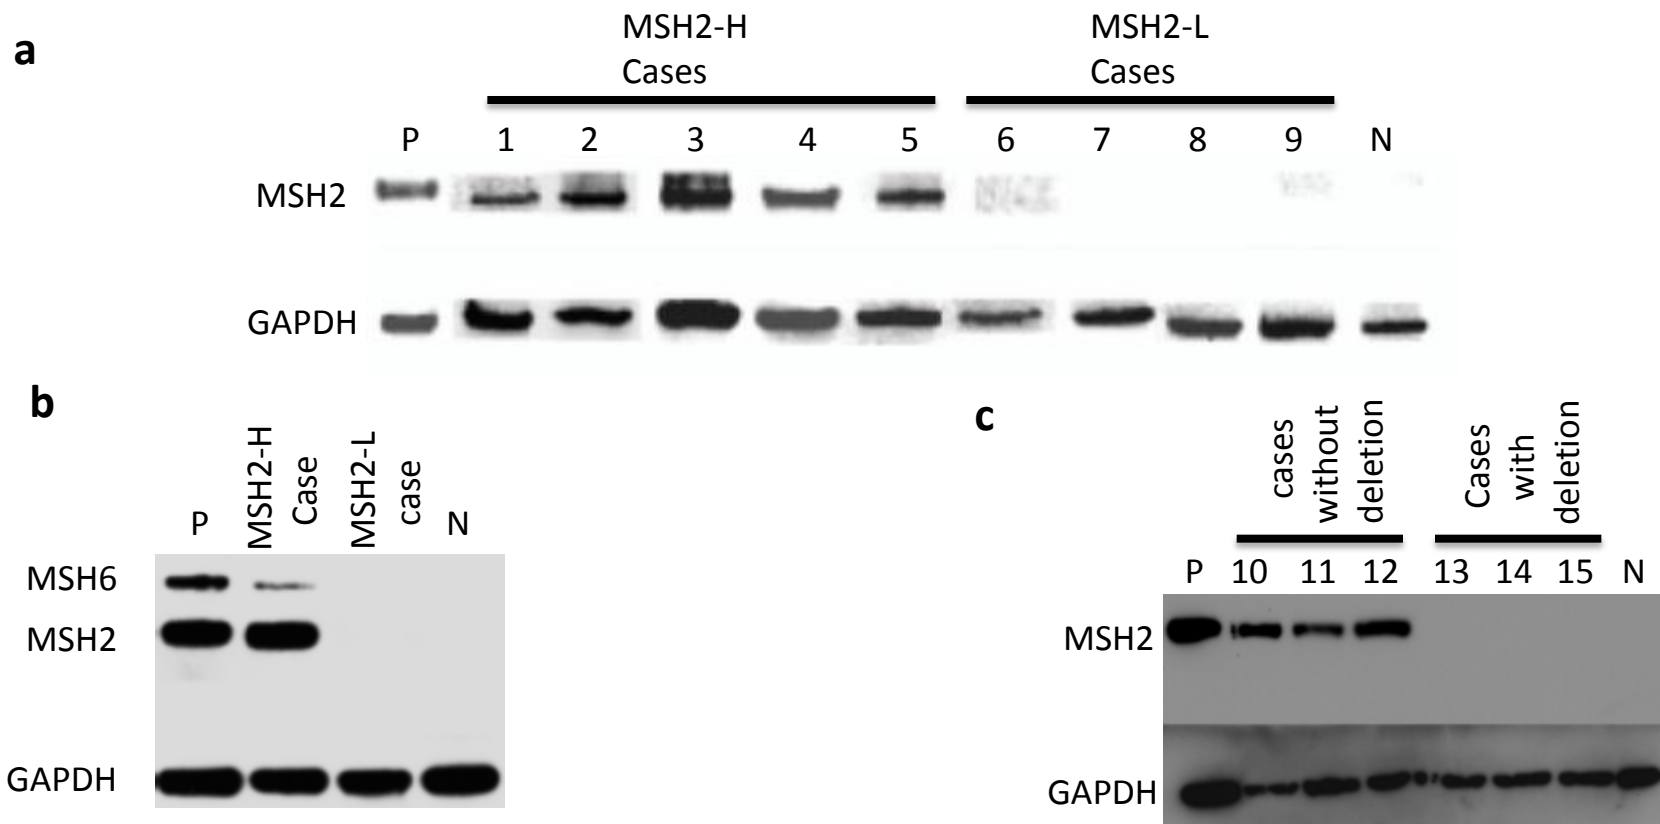

P= MSH2, MSH6 positive cell line (697 cell line)

N= MSH2, MSH6 negative cell line (NALM-6 cell line)

**Supplementary Fig. 1.** Representative western blots of MSH2-L and MSH2-H Patients. MSH2 protein levels were determined by western blot in primary human leukemia cells. **(a)** Patients from the discovery cohort with low and high MSH2 protein levels are shown with GAPDH as loading control. NALM-6 and 697 human leukemia cell lines were respectively used as MSH2 negative and MSH2 positive controls. **(b)** MSH6 protein levels were also determined by western blot in MSH2-H patients and MSH2-L patients documenting low MSH6 when MSH2 is low (representative patients from the discovery cohort are shown). **(c)** Representative western blots of leukemia cells with deletions and matched cases without deletions from the validation cohort. NALM-6 and 697 human leukemia cell lines were respectively used as MSH2 negative and MSH2 positive controls.

**a**

MSH2-L  
(n=7)

MSH2-H  
(n=62)

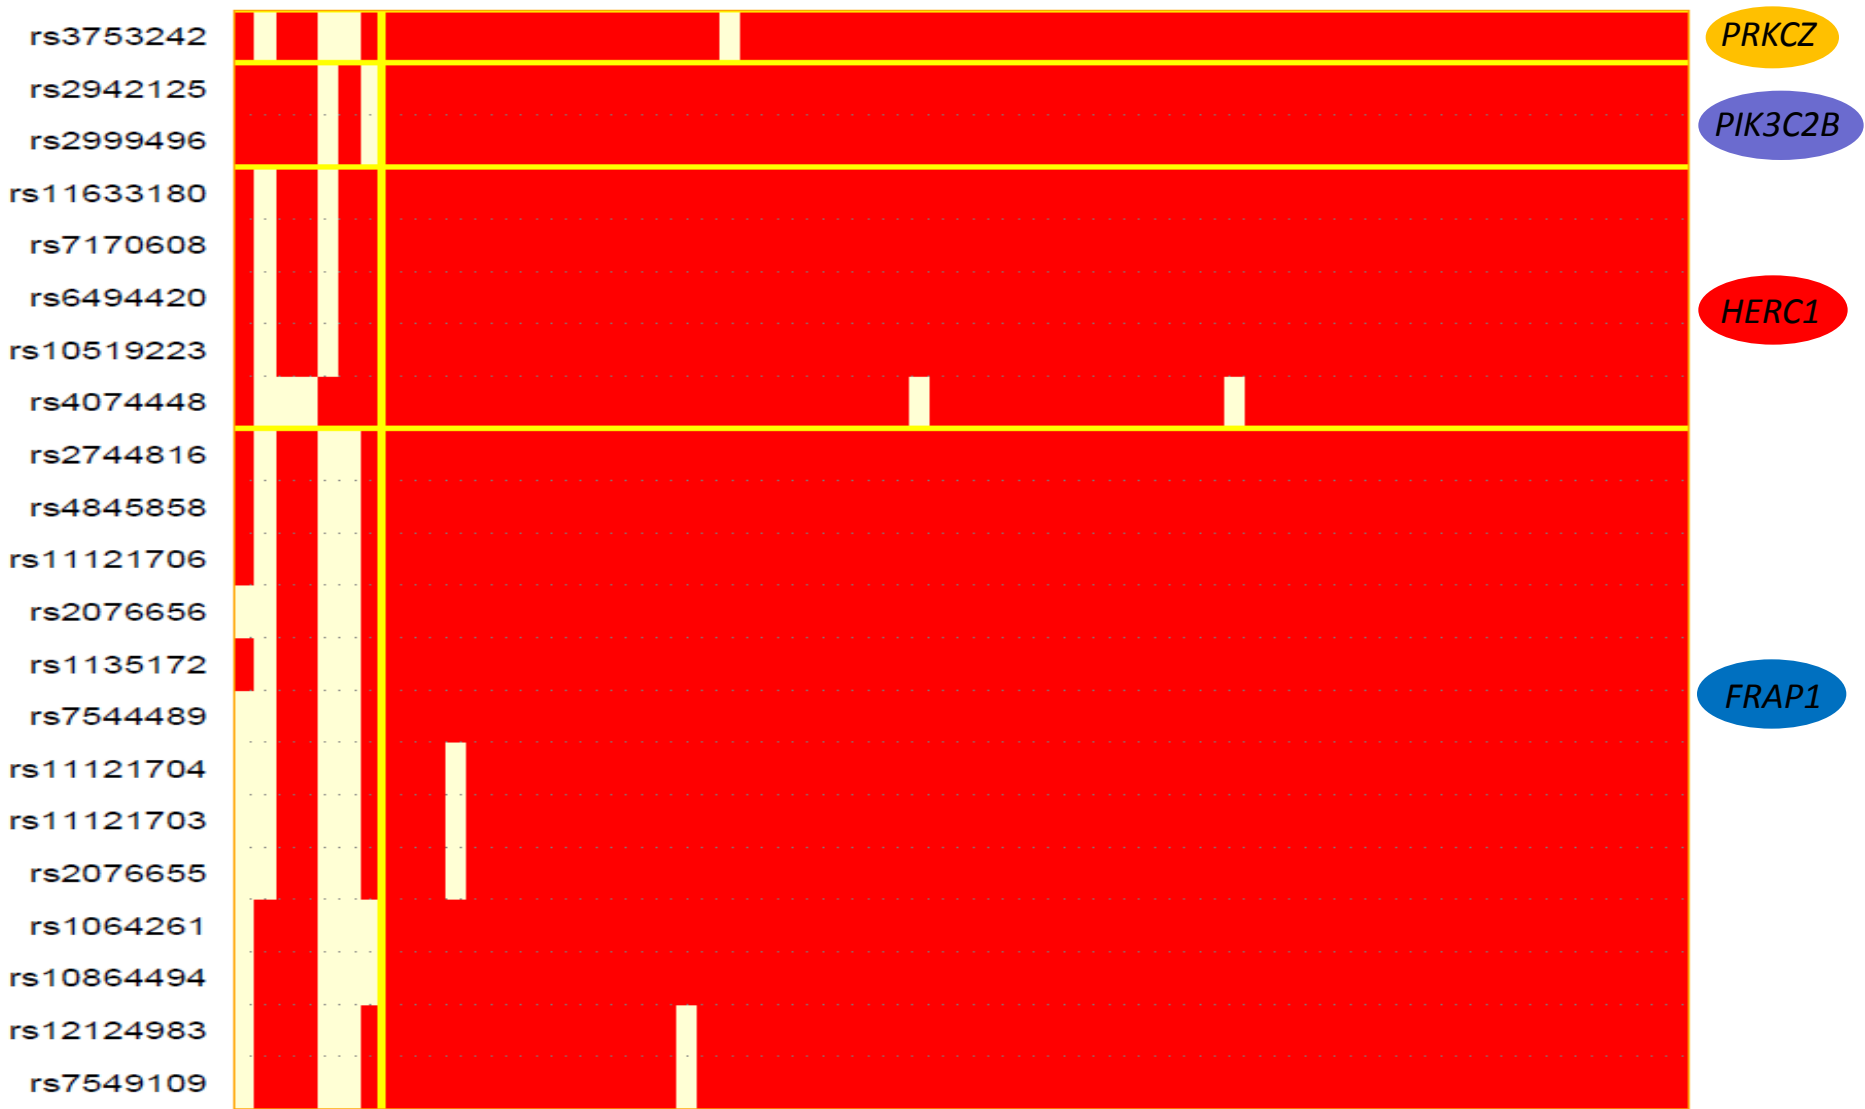

□ Monoallelic loss

■ Diploid copy number

PRKCZ

PIK3C2B

HERC1

FRAP1

**b**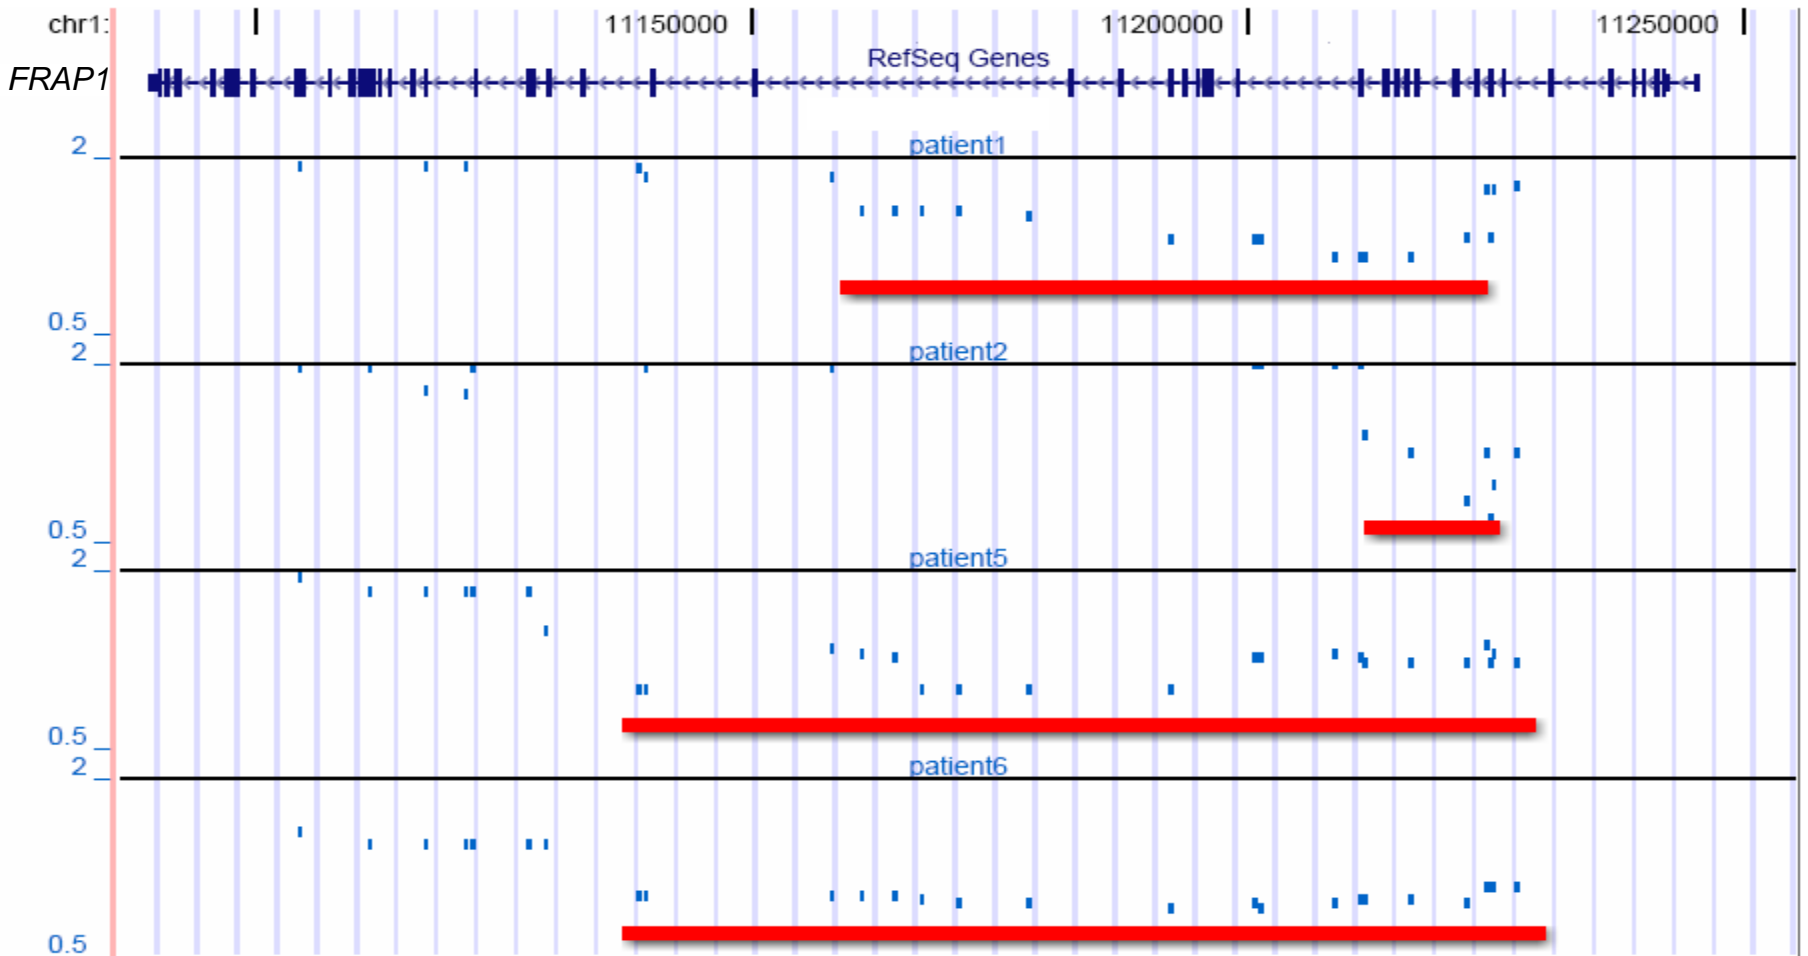

**c**

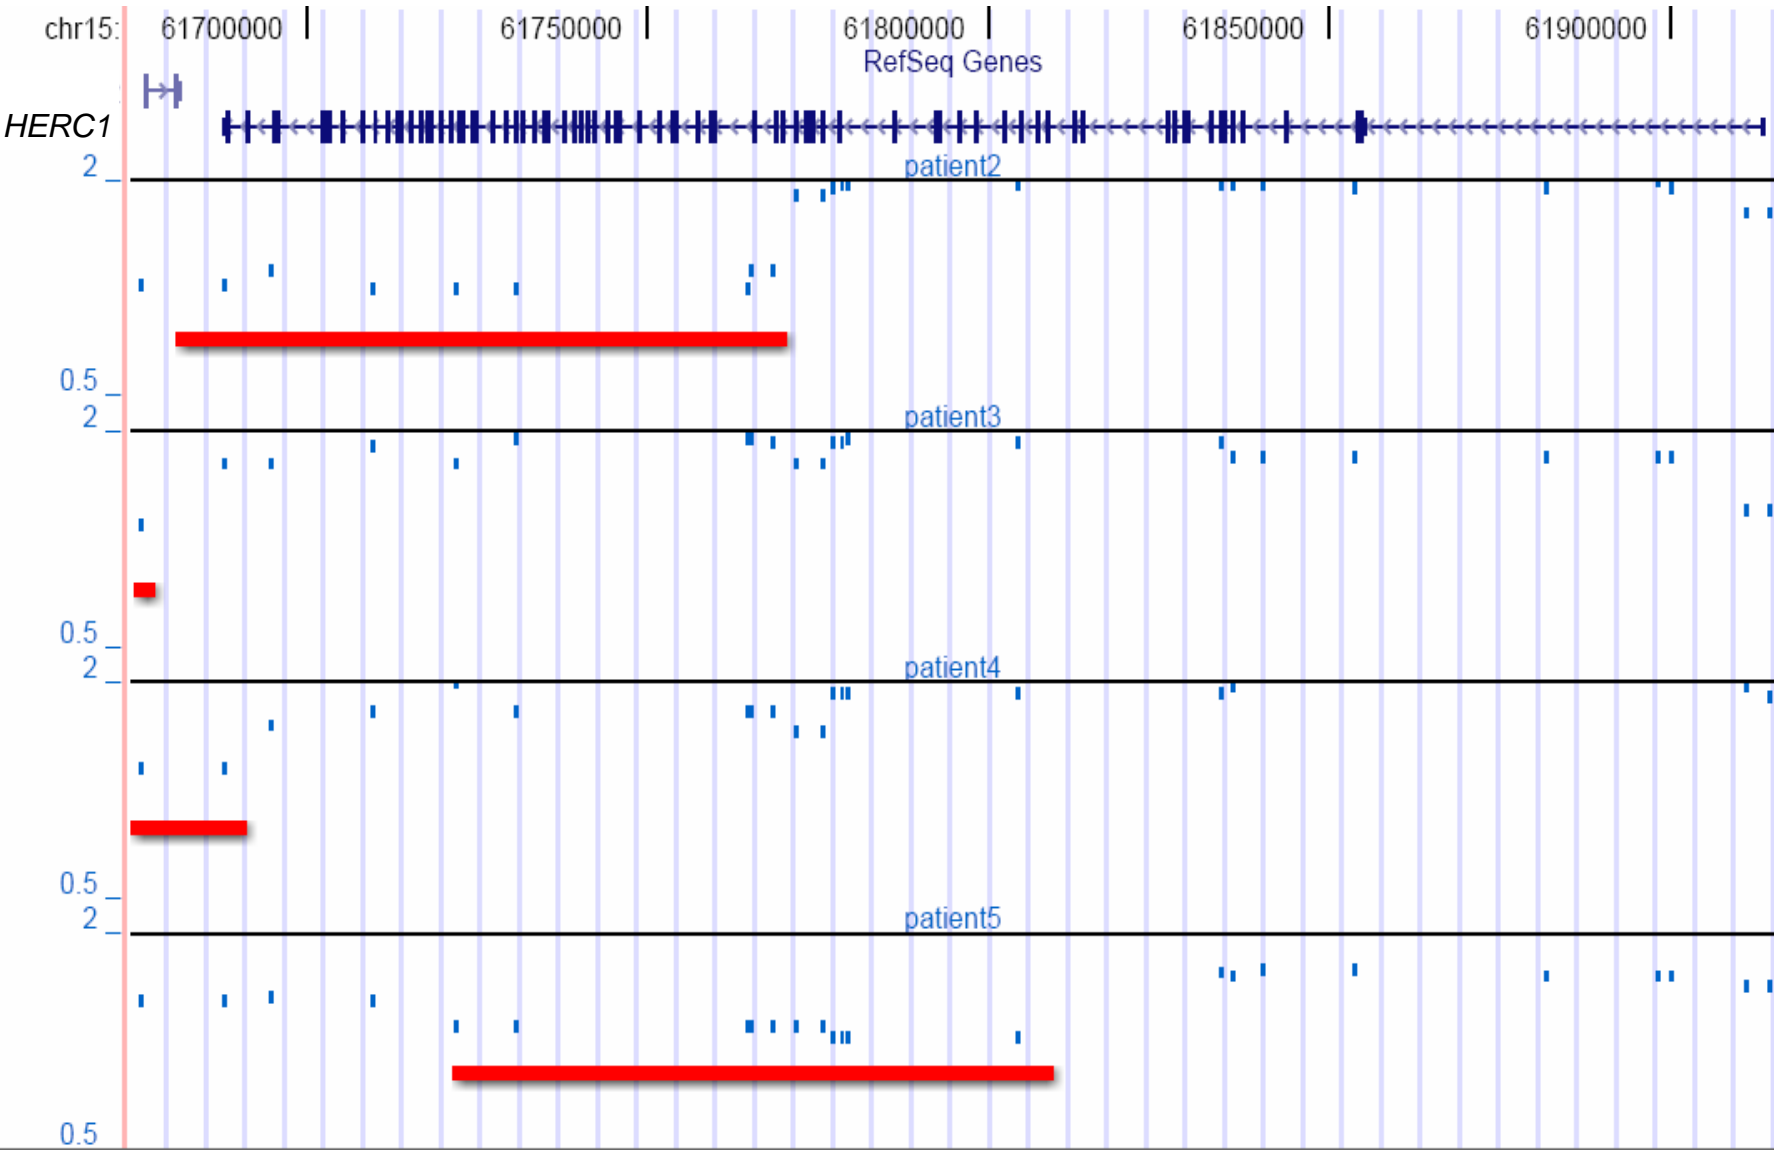

d

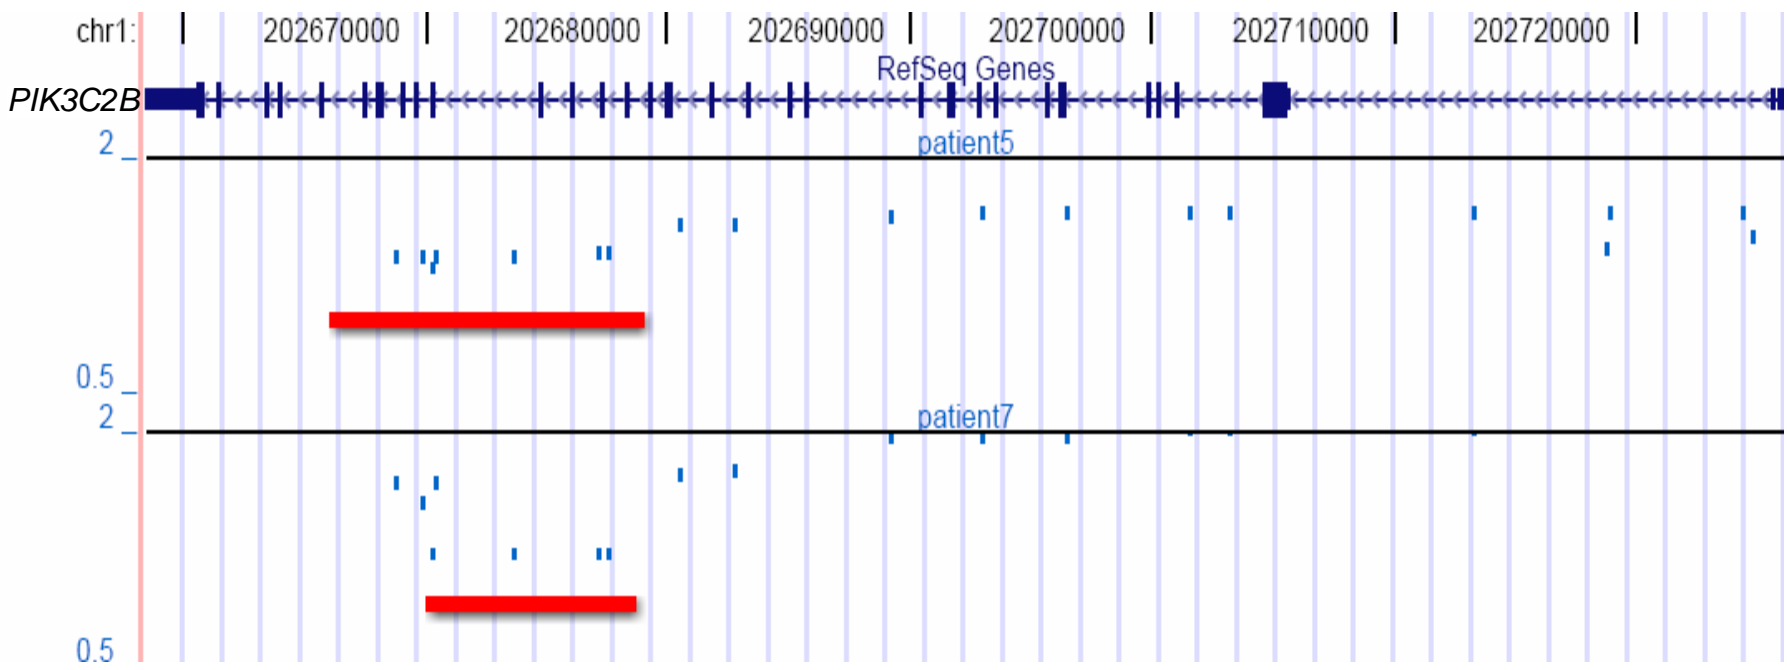

**e**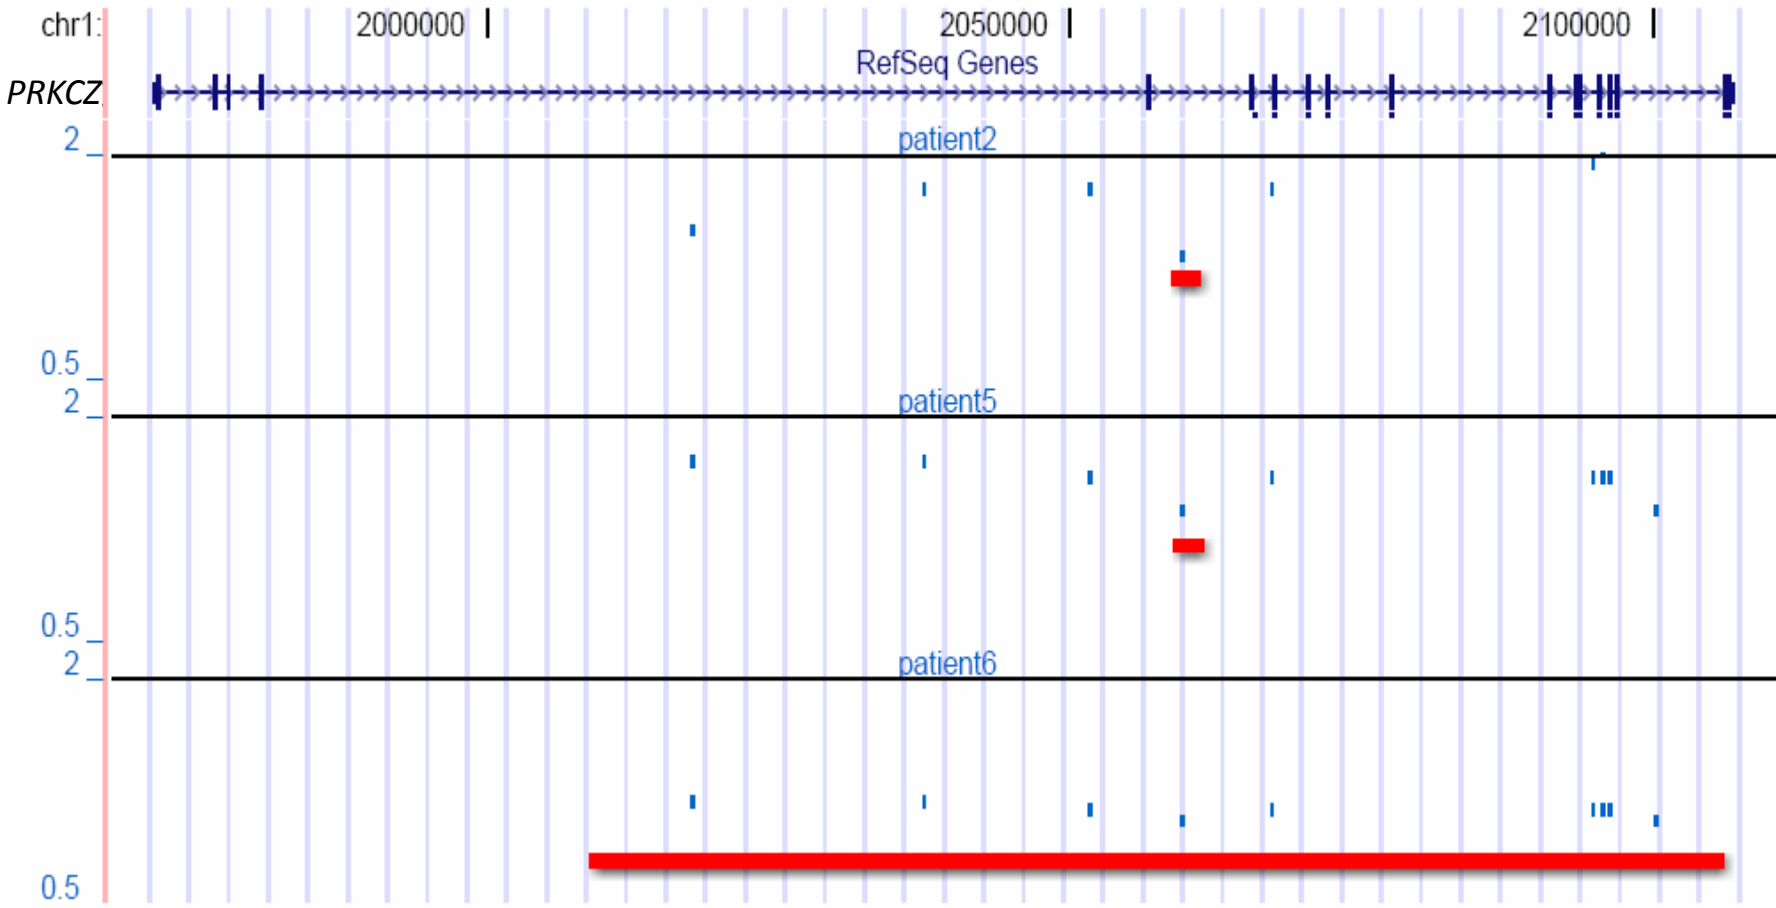

**Supplementary Fig. 2.** Gene copy analysis and location of deletions. **(a)** Gene copy number analysis of genes in the Pathway controlling MSH2 degradation depicting analysis of primary human leukemia cells with mono-allelic loss in yellow and diploid copy number in red. SNP array data were analyzed using dChip. **(b-d)** Location of deletions based on the SNP array data. Each light blue box is a SNP interrogated on the affy array and the horizontal black line represents two copies (labeled “2”). A copy number of < 1.4 was considered a deletion, and subsequently verified by RT-PCR.

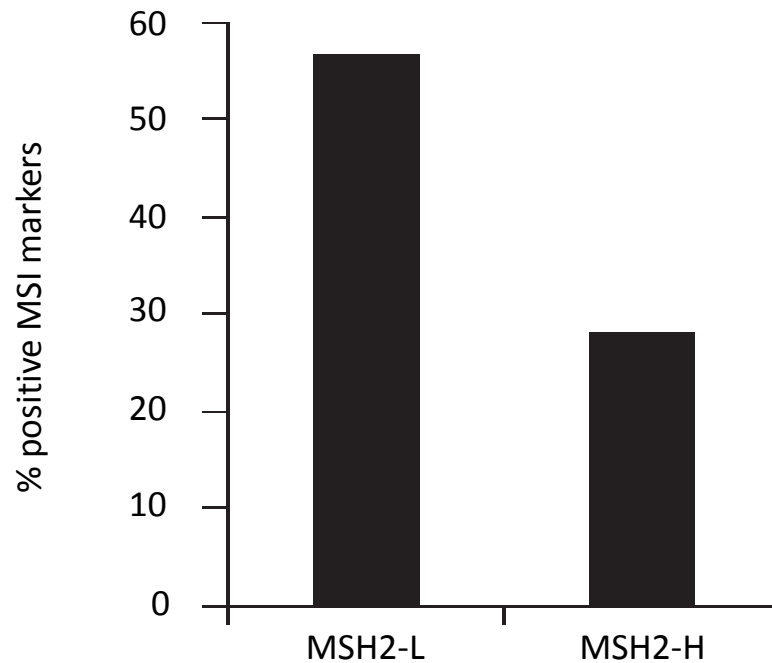

**Supplementary Fig. 3.** Microsatellite instability (MSI) in primary ALL cells. By using the quasi-monomorphic consensus DNA markers NR24, BAT25, BAT26, NR21 and NR22, MSH2-L leukemia cells showed more positive MSI markers than the MSH2-H cells.



**a**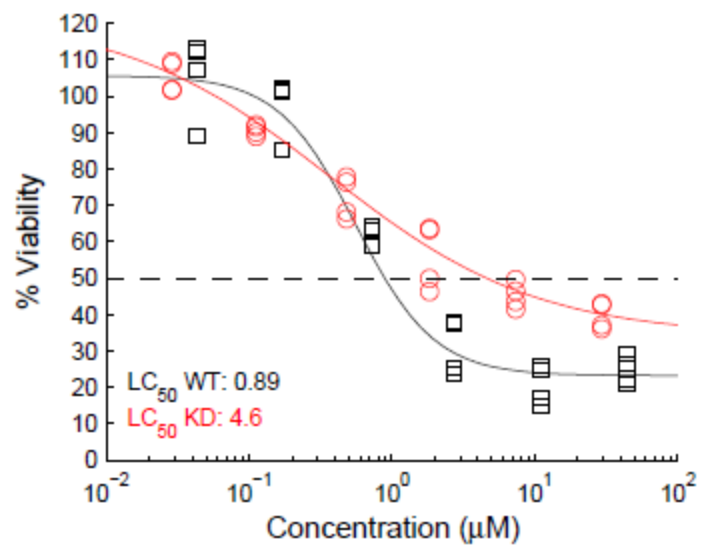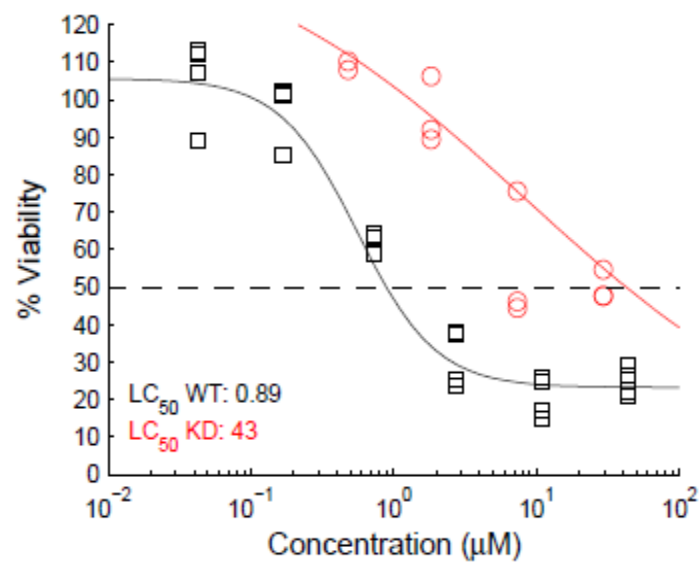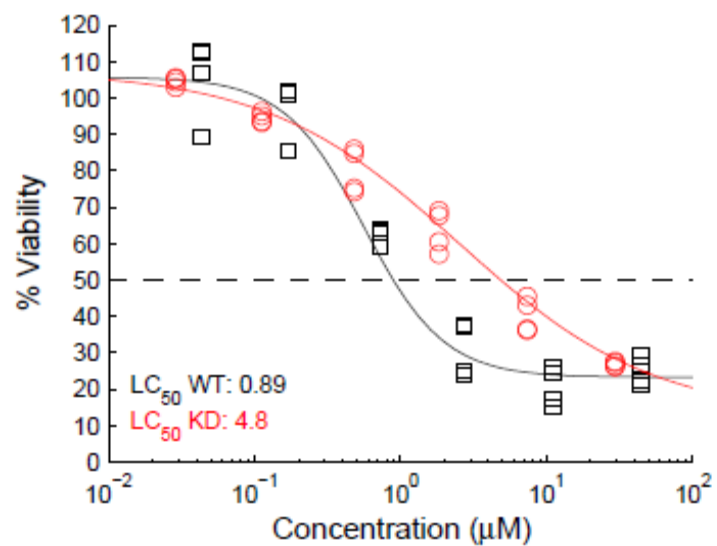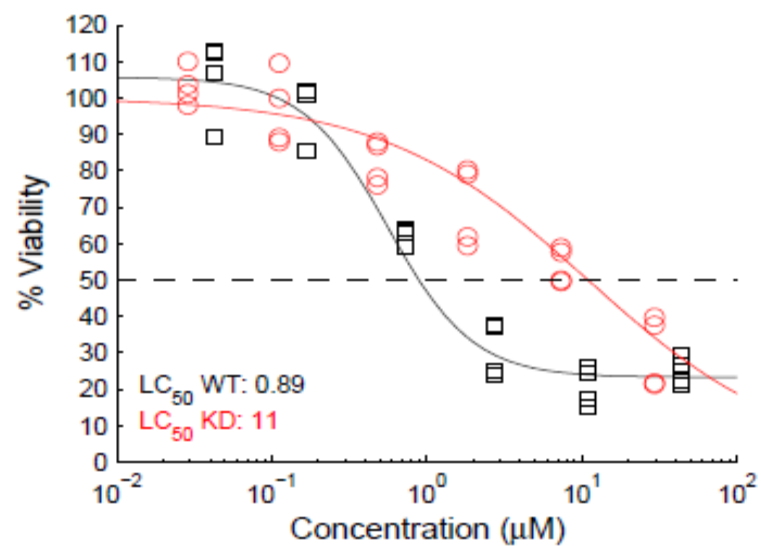

**b**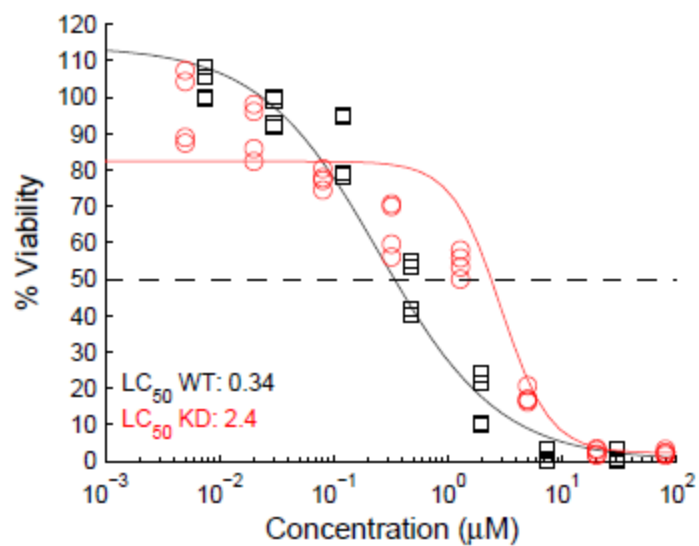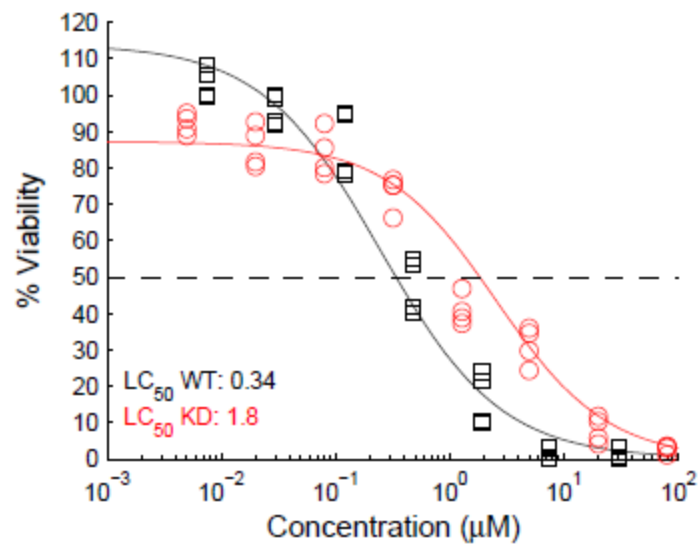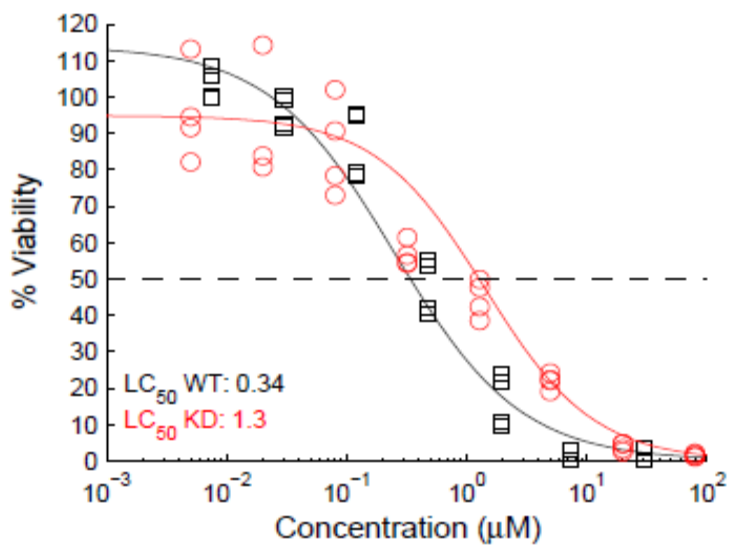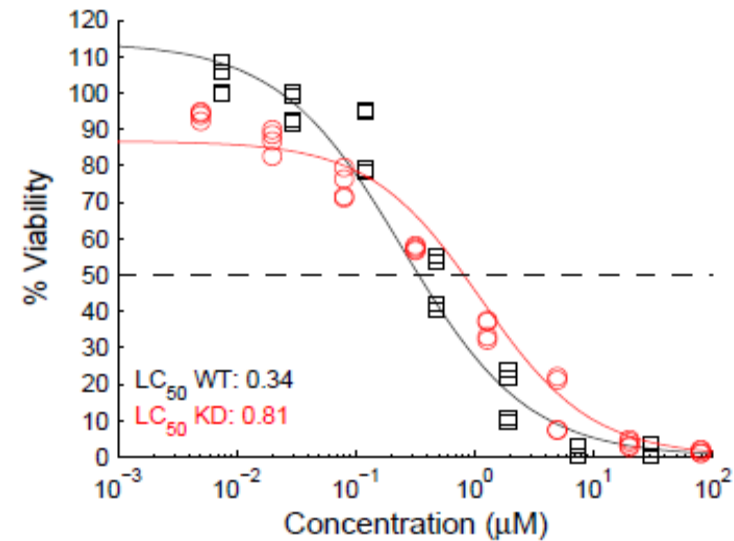

**c**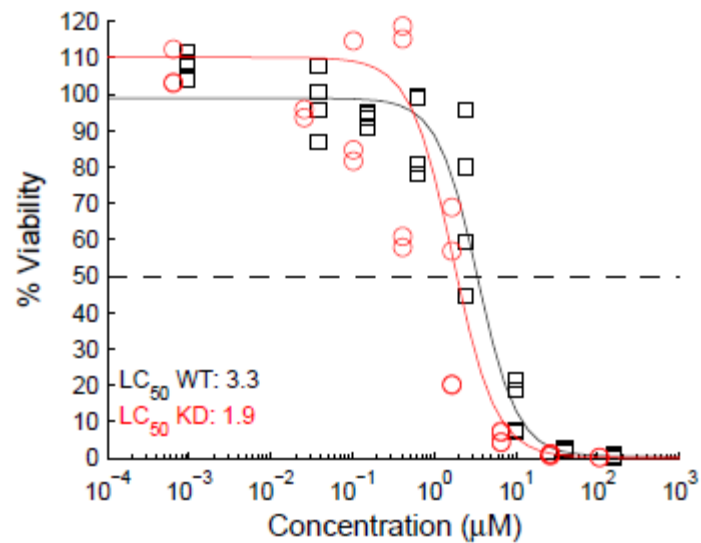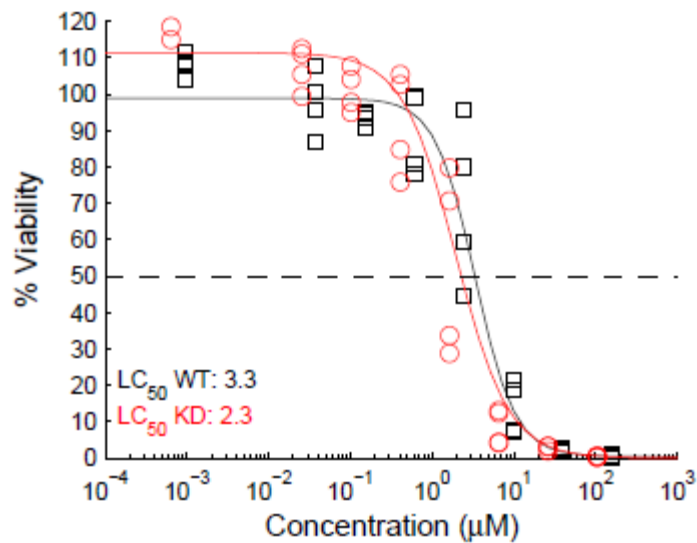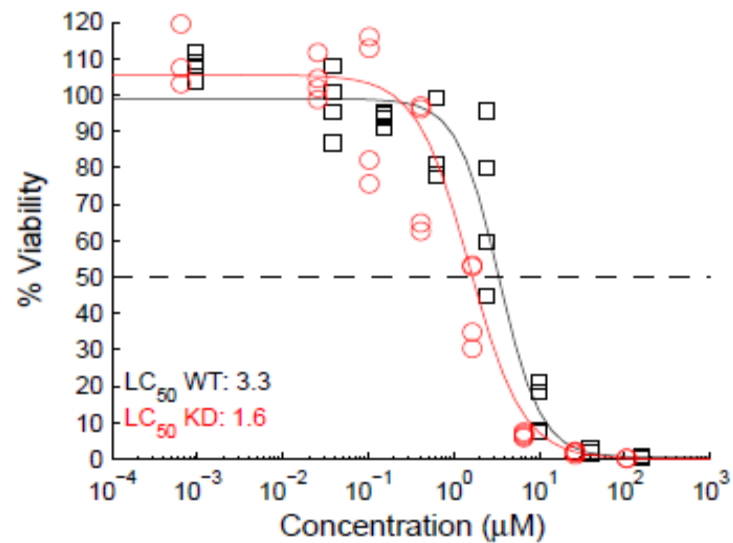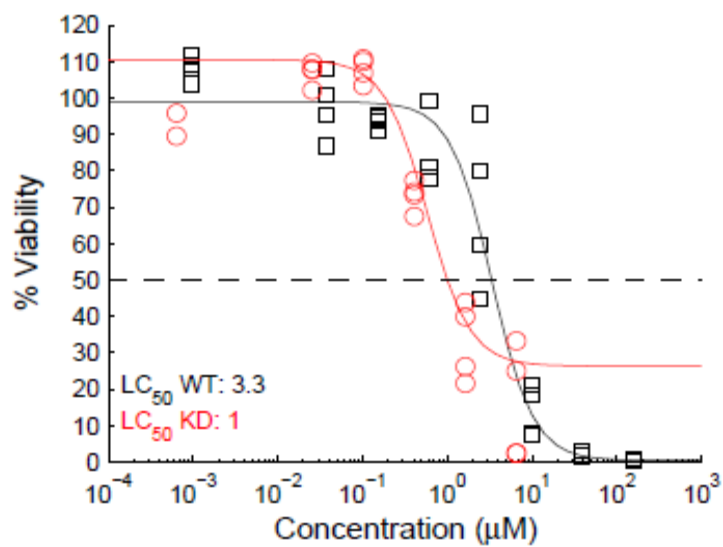

**d**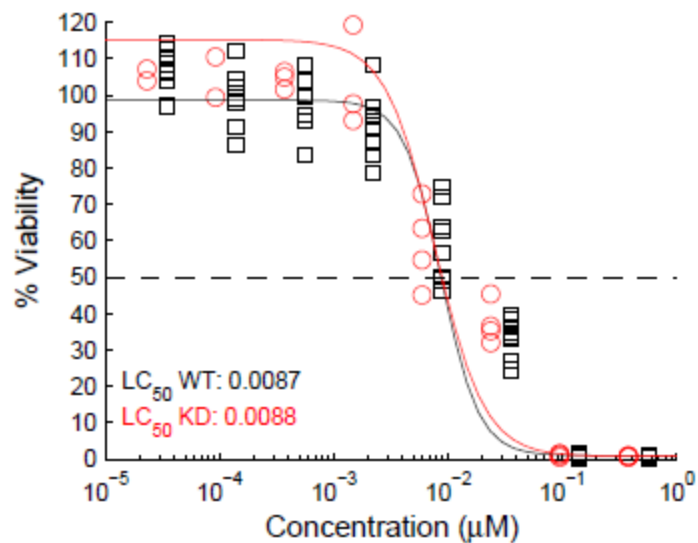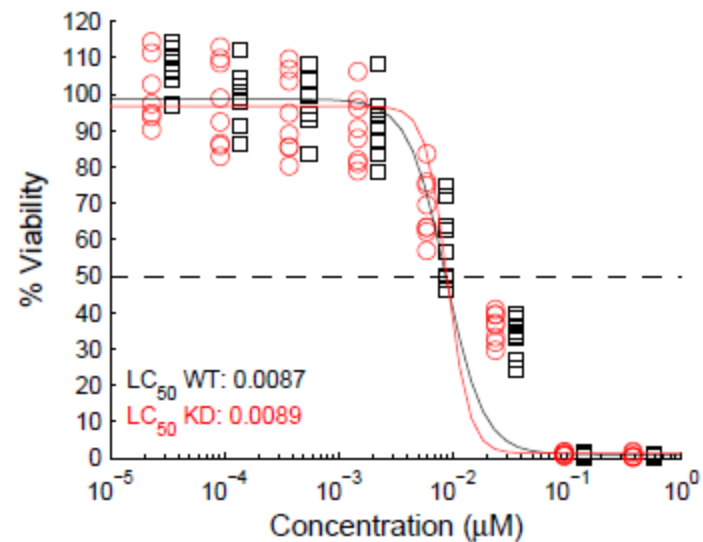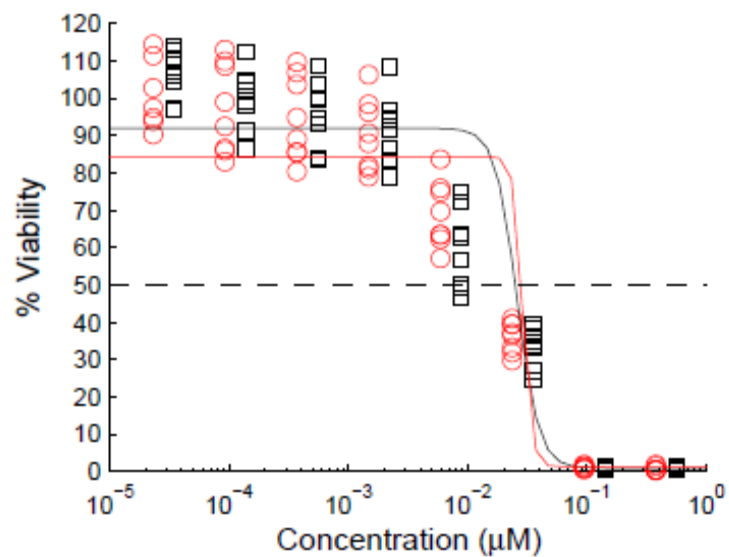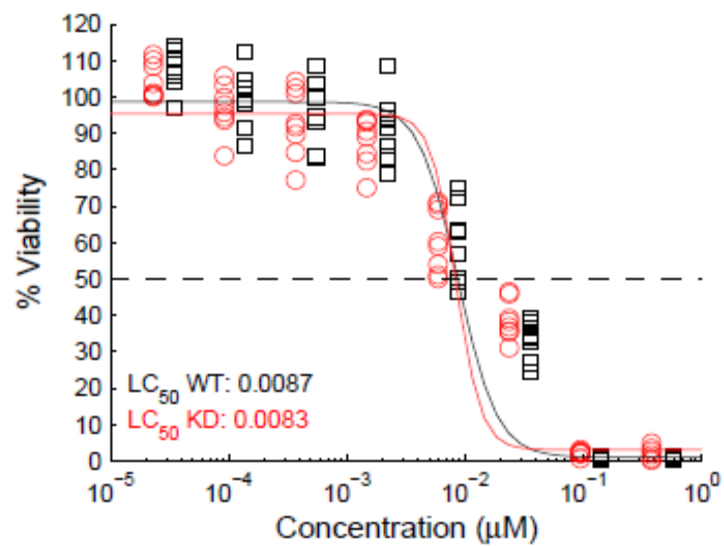

**e**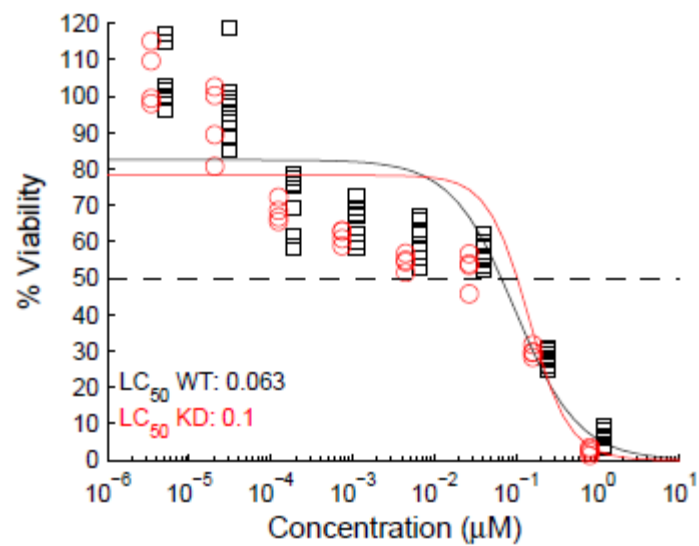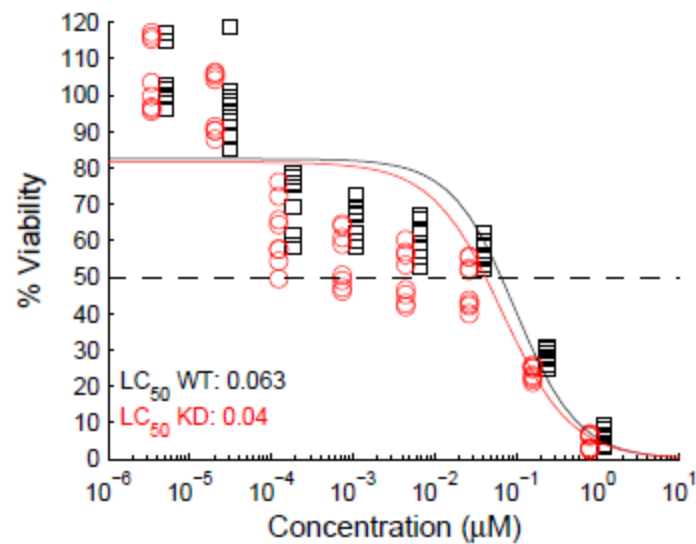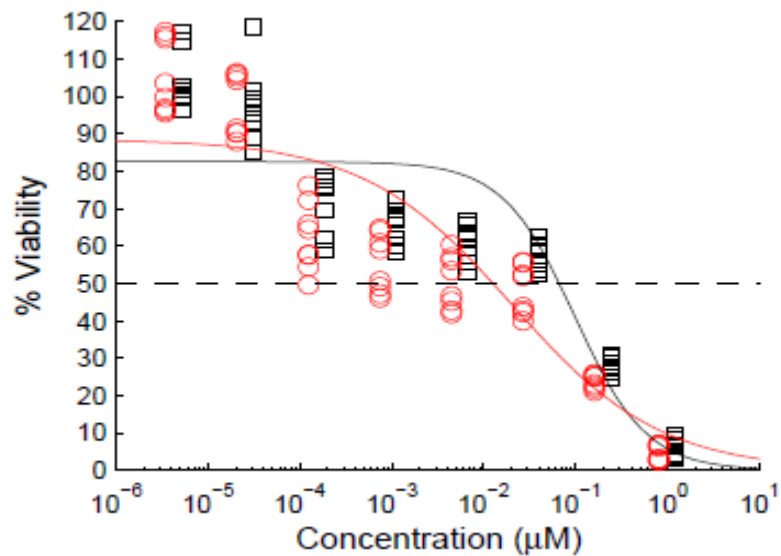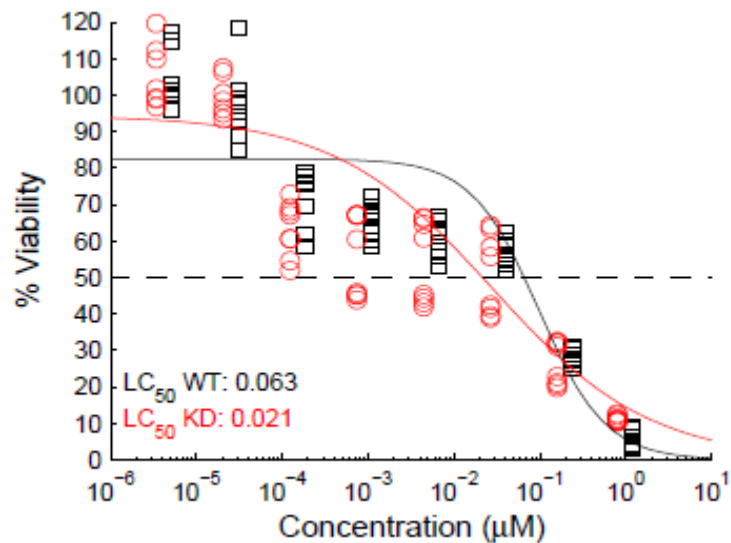

f

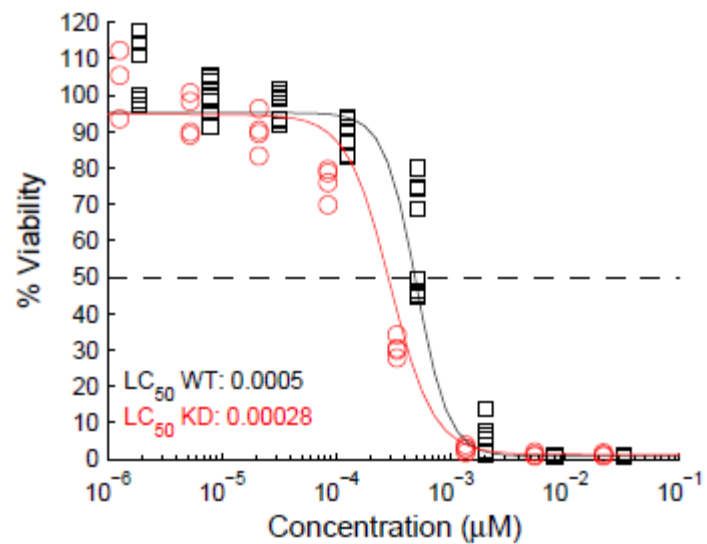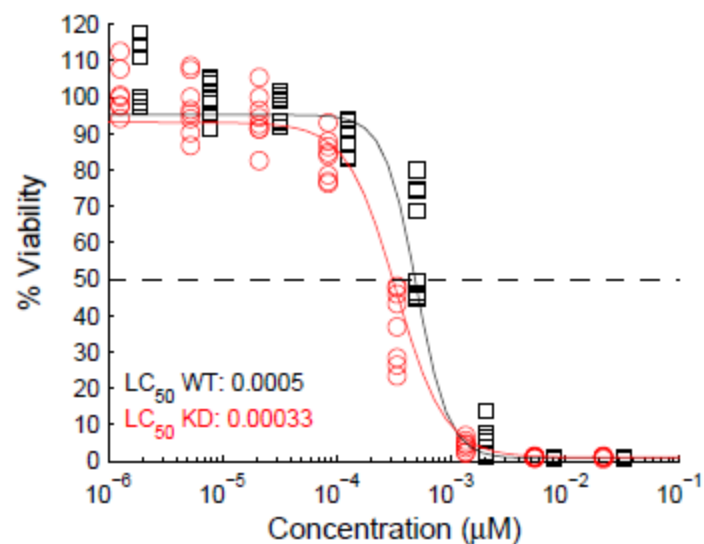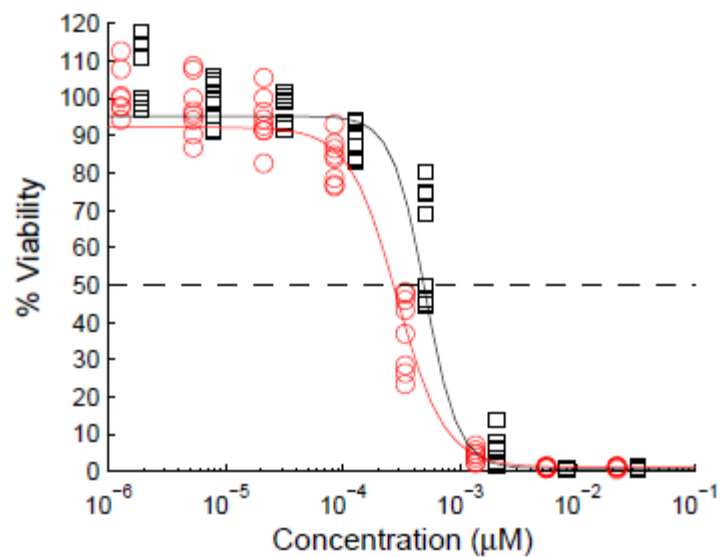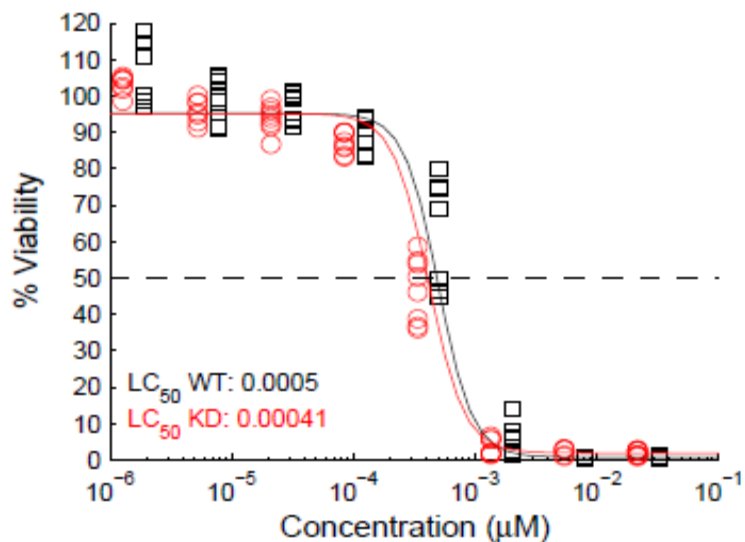

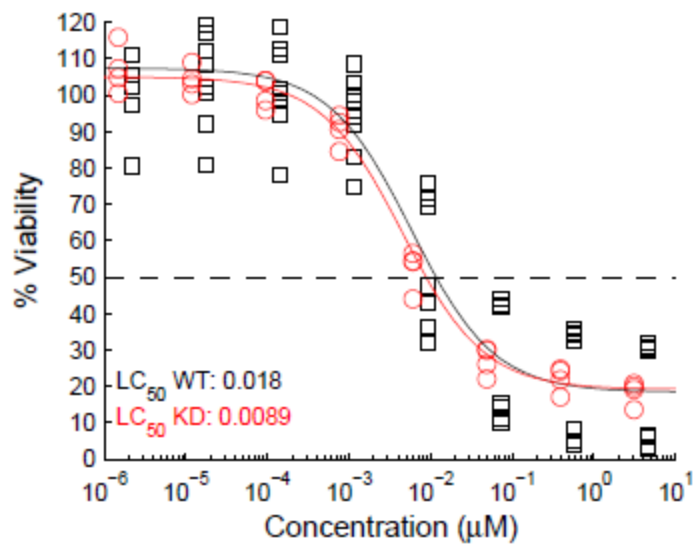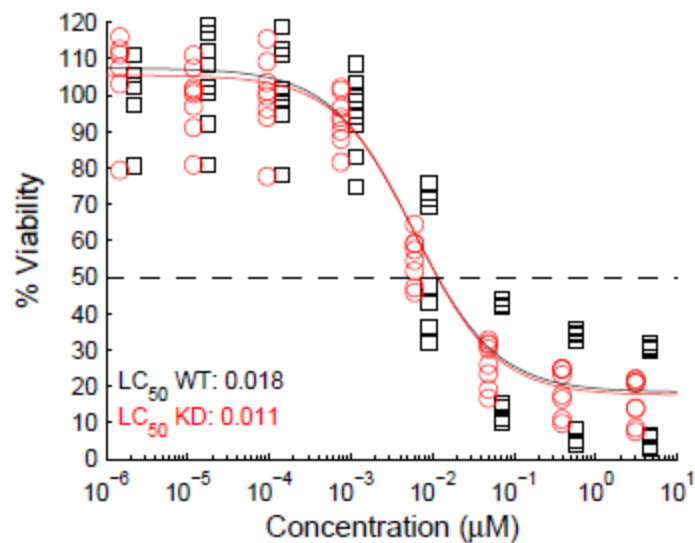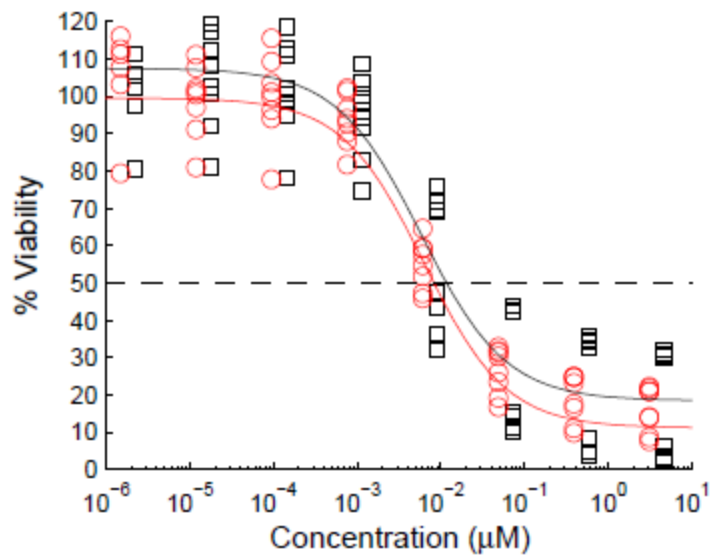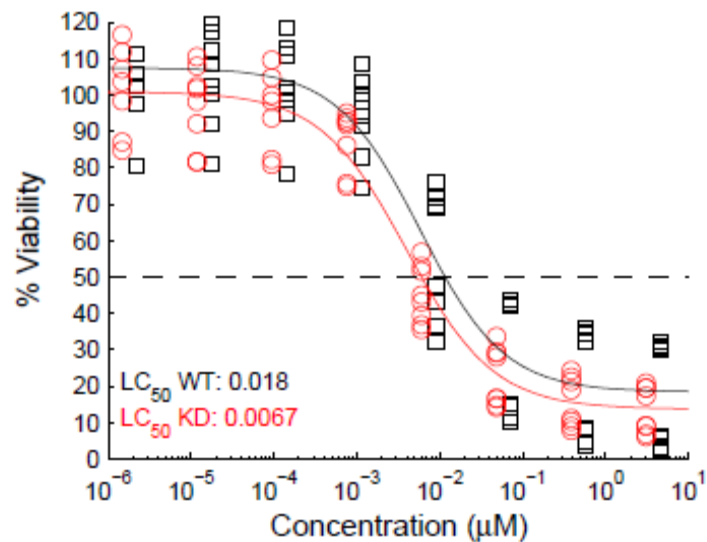

**h**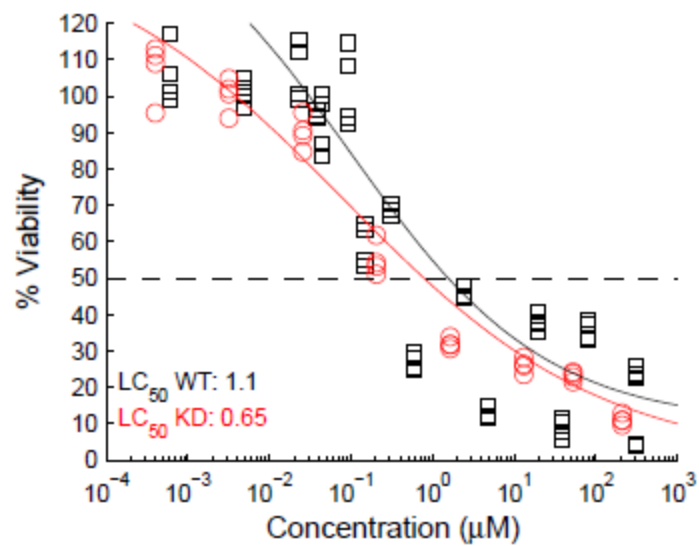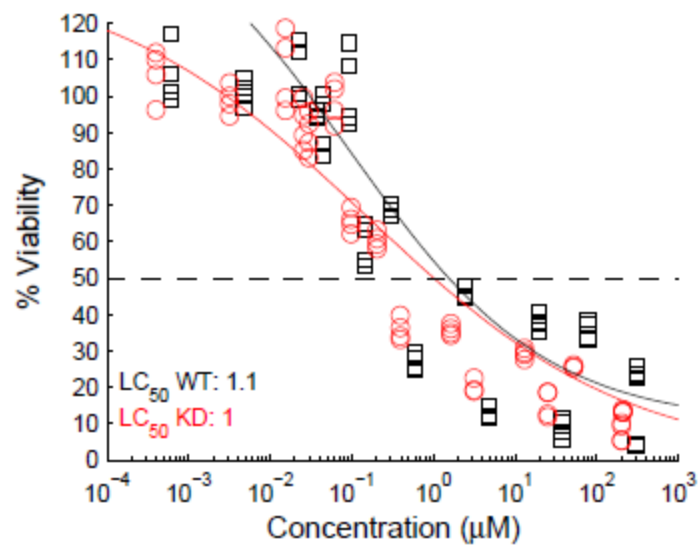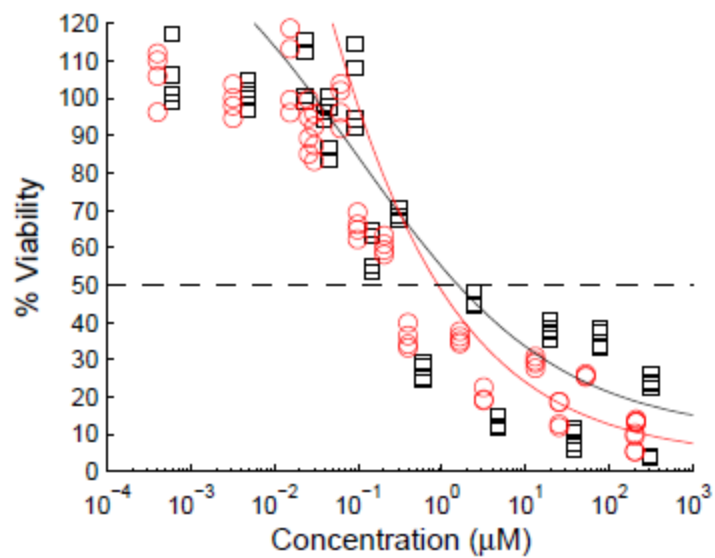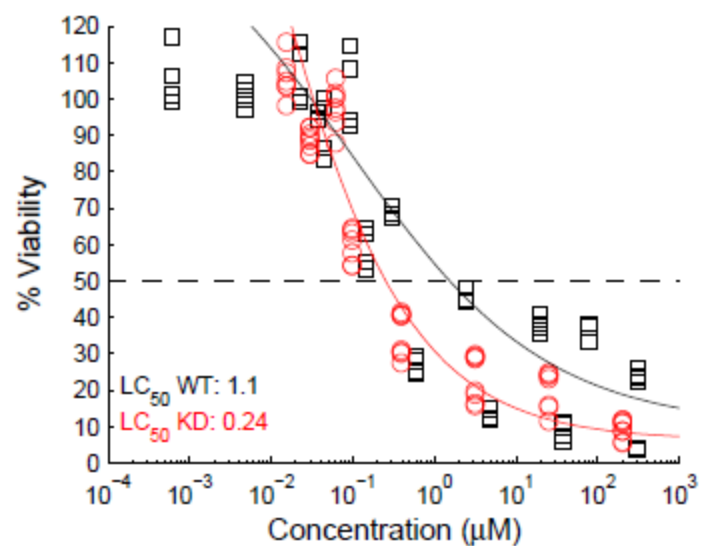



**Supplementary Fig. 4.** Effects of knockdowns on drug sensitivity. CCRF-CEM cells in which *FRAP1* (top left), *HERC1* (top right), *PIK3C2B* (bottom left) or *PRKCZ* (bottom right) were knocked-down and were treated for 72 hours in the presence of increasing concentrations of 6-MP (**a**), 6-TG (**b**), melphalan (**c**), daunorubicin (**d**), L-asparaginase (**e**), vincristine (**f**), dexamethasone (**g**) and prednisolone (**h**). Cell viability was determined by the MTT assay and expressed relative to untreated control cell cultures.

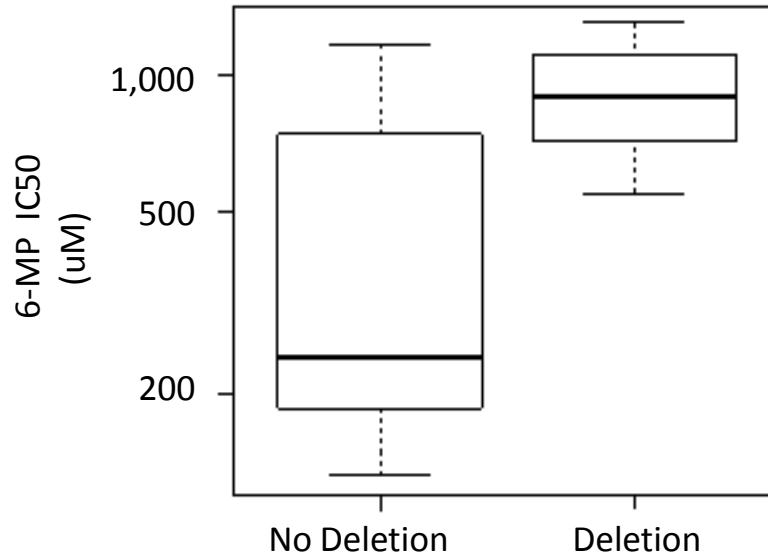

**Supplementary Fig. 5.** Sensitivity of primary ALL cells to mercaptopurine (6-MP). Primary ALL cells isolated from patients without (8 patients) or with (4 patients) deletions of *PIK3C2B*, *HERC1*, *FRAP1* or *PRKCZ* were tested for sensitivity to 6-MP using the MTT assay. The eight patients without deletions were matched to the cases with deletions based on ALL lineage, molecular subtype and patient race. The horizontal lines in each boxplot indicate the mean IC50 values for each group and the bottom and top of the box depict the 25<sup>th</sup> and 75<sup>th</sup> percentile.

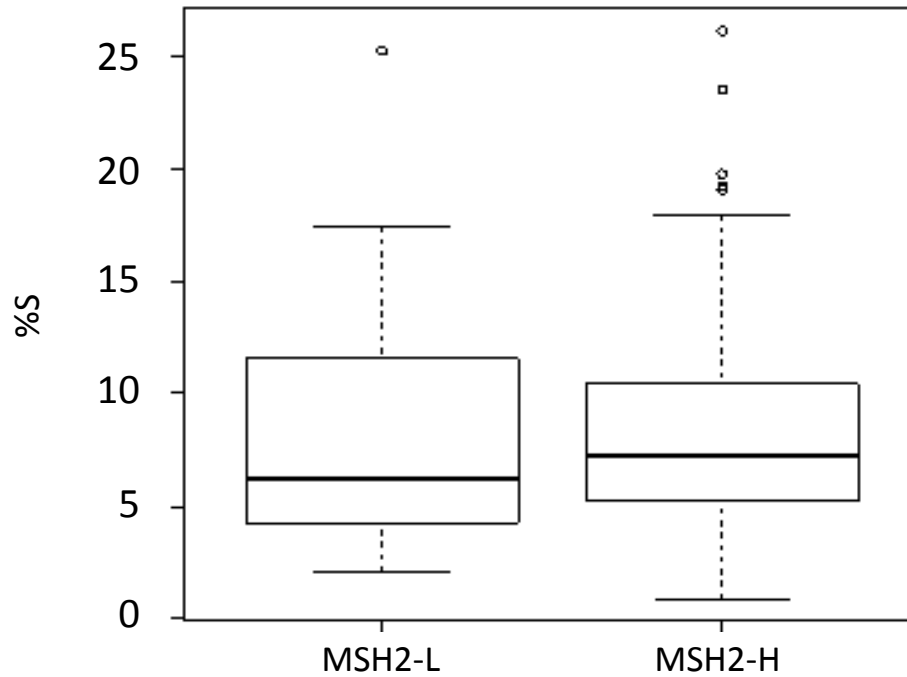

**Supplementary Fig. 6.** Percentage of cells in S phase at diagnosis in the MSH2-L and MSH2-H patients (69 patients in the discovery cohort with 62 MSH2-H and 7 MSH2-L and 21 patients in the validation cohort with 15 MSH2-H and 6 MSH2-L). Wilcoxon rank-sum test indicated no significant difference between the two groups. ( $P = 0.79$ )

**a**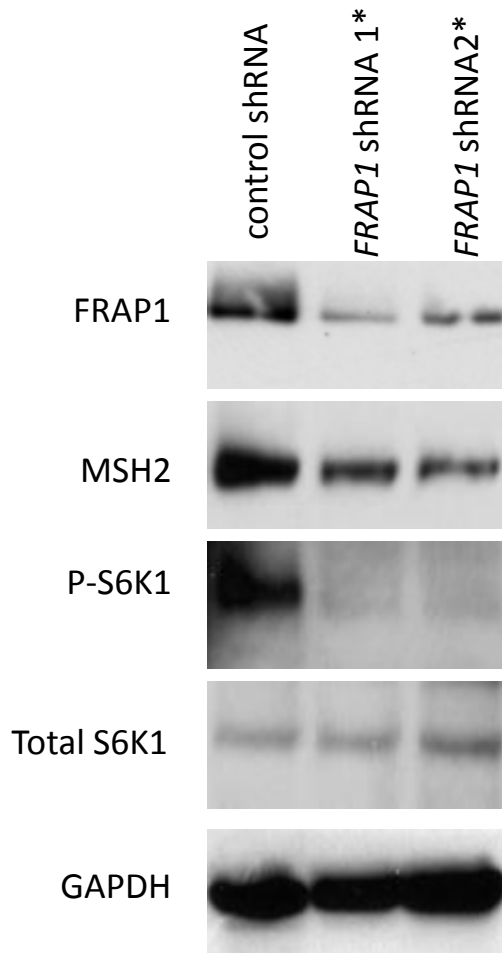

\* = clone

**b**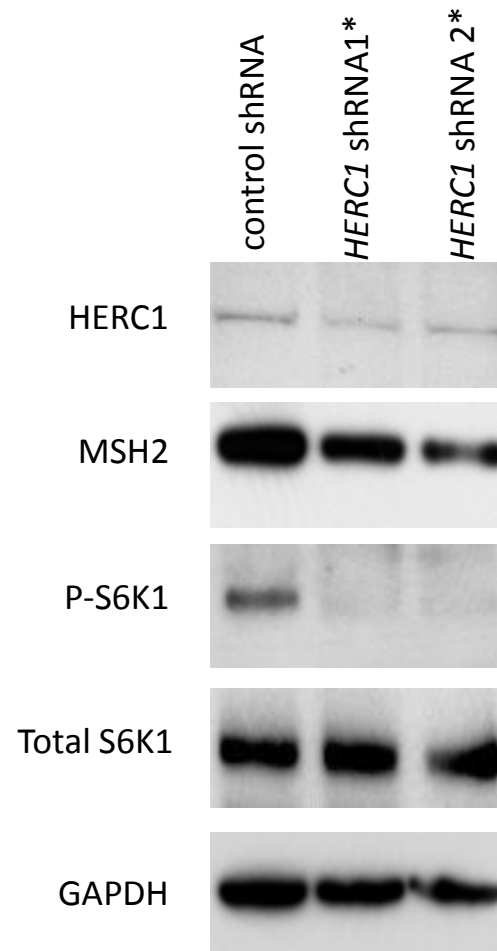

**c**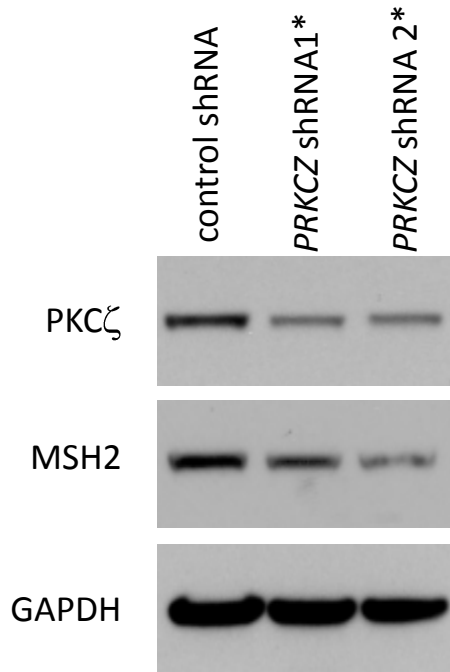

\* = clone

**d**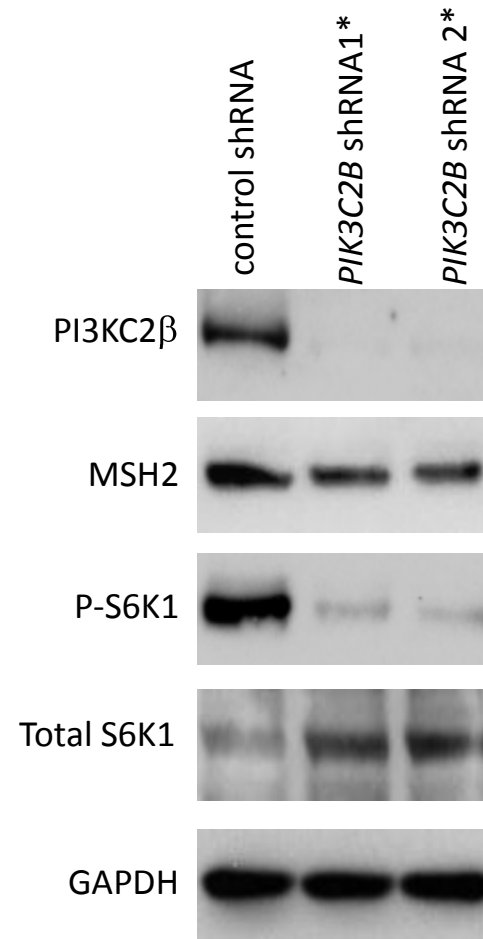

**Supplementary Fig. 7.** Knockdown of *FRAP1*, *HERC1*, *PIK3C2B* and *PRKCZ* by two different shRNA clones for every gene. *FRAP1* (a), *HERC1* (b), *PRKCZ* (c) and *PIK3C2B* (d) genes were each knocked down by two different shRNAs (sequences of the clones are provided in supplementary Methods). The protein signals were determined by western blot.

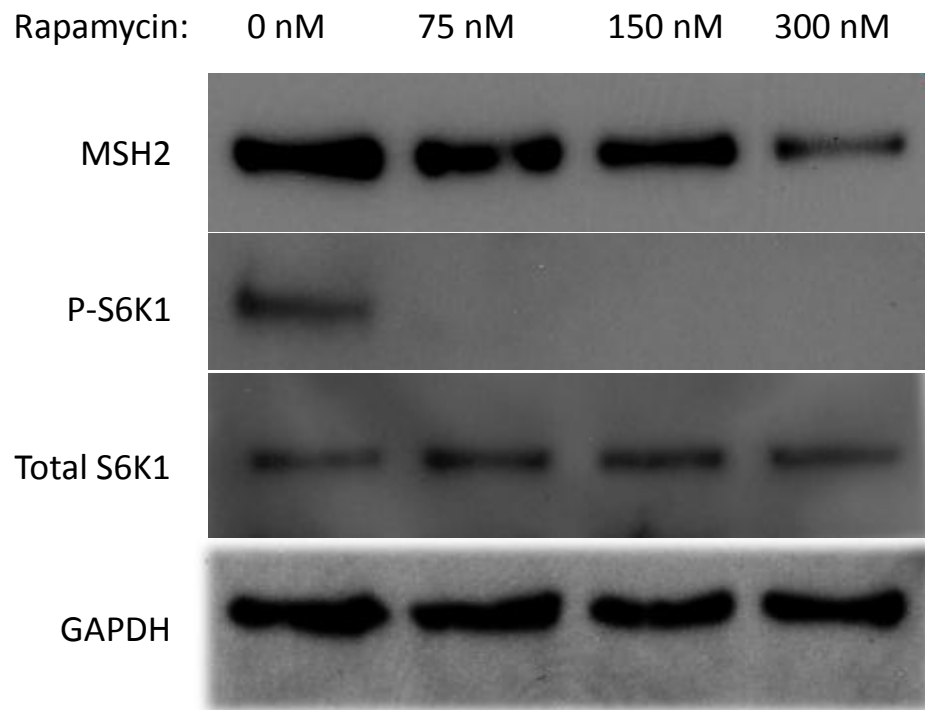

**Supplementary Fig. 8.** Rapamycin treatment of human B cell precursor leukemia. Pre-B ALL human cell line (697) were treated with increasing concentrations of rapamycin. MSH2 and GAPDH protein levels were determined by western blot. Phosphorylation of P70S6 kinase (Thr389) was measured by a phospho-specific antibody.

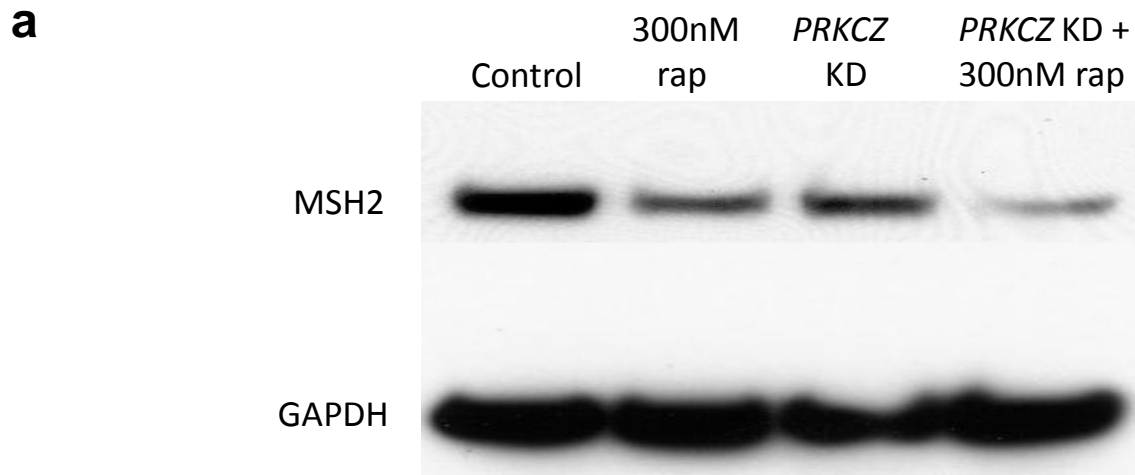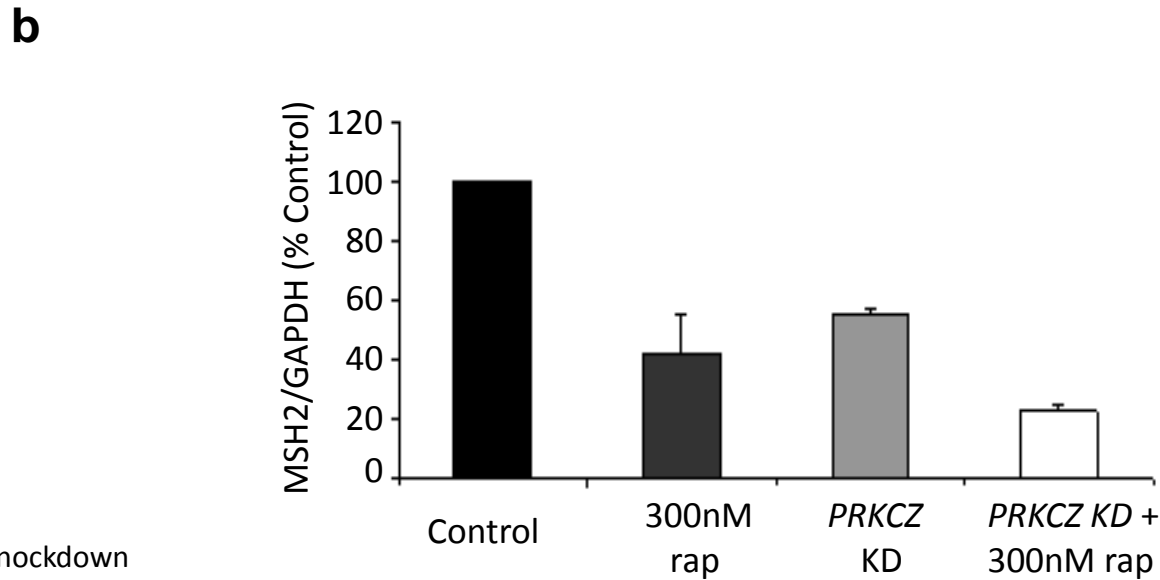

KD = knockdown  
Rap = Rapamycin

**Supplementary Fig. 9.** Rapamycin treatment after knockdown of *PRKCZ* gene (equivalent to double knockdown). Human leukemia cells (CCRF-CEM) were treated with 300nM of rapamycin, with or without transduction of shRNA against *PRKCZ*. **(a)** MSH2 and GAPDH protein levels were determined by western blot. **(b)** The level of MSH2 protein level was quantified and normalized to GAPDH.

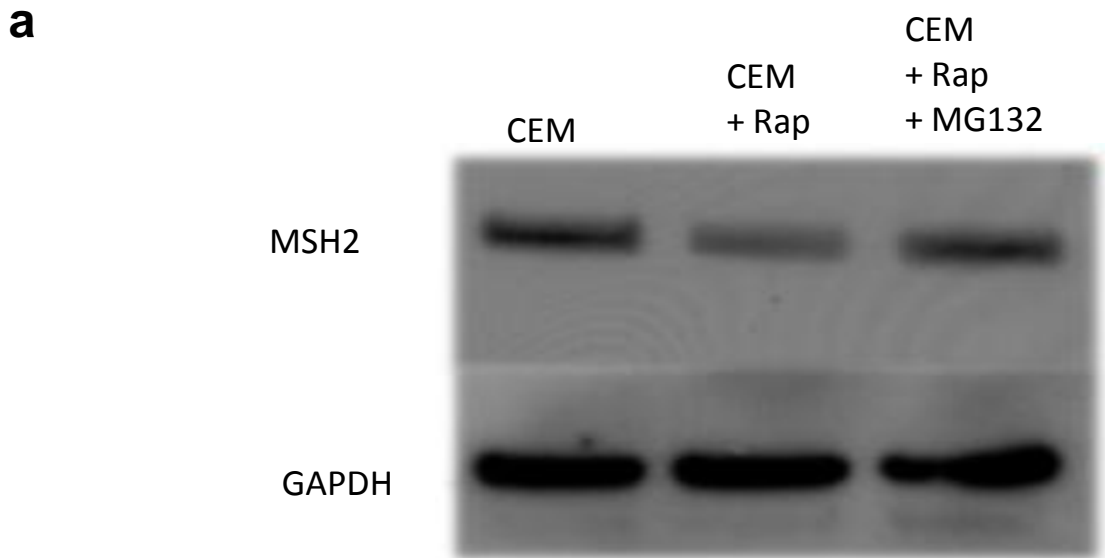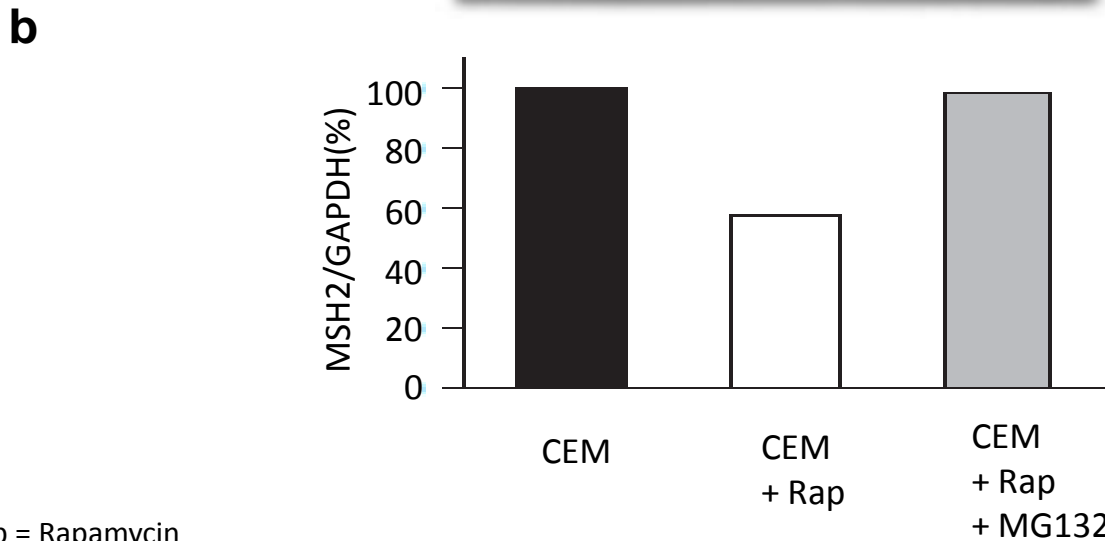

Rap = Rapamycin

**Supplementary Fig. 10.** Enhanced degradation of MSH2 after FRAP1 inhibition is blocked by proteasome inhibitor MG132. Human leukemia cells (CEM) were treated or not with 300nM of rapamycin, with or without 10nm of MG132. MSH2 and GAPDH protein levels were determined by western blot and the MSH2/GAPDH ratio is depicted in the bottom panel).



**Table 1.** Confirmation of gene deletions in ALL cells by RT-PCR.

|                   | 1           | 2           | 4           | 5           | 6           | 7           | Control(Not deleted) |
|-------------------|-------------|-------------|-------------|-------------|-------------|-------------|----------------------|
| <i>FRAP1/mTOR</i> | <b>0.40</b> | <b>0.68</b> | 0.72        | <b>0.37</b> | <b>0.30</b> | 0.84        | 1.32                 |
| <i>HERC1</i>      | 0.72        | <b>0.50</b> | <b>0.62</b> | <b>0.43</b> | 0.89        | 1.79        | 1.87                 |
| <i>PIK3C2B</i>    | 0.71        | 1.17        | 1.01        | <b>0.59</b> | 0.94        | <b>0.65</b> | 1.11                 |
| <i>PRKCZ</i>      | 0.72        | 1.08        | 1.13        | <b>0.64</b> | <b>0.69</b> | 1.13        | 1.08                 |

Bold represents deletions. Cutoffs of 0.7 and 0.3 were used to identify hemizygous and homozygous deletions respectively.

**Table 2.** Clinical features of patients assayed for MSI Genotyping.

| <b>Patient</b> | <b>MSH2 status</b> | <b>Gender</b> | <b>Race</b> | <b>Age</b> | <b>Risk</b> | <b>Lineage</b> |
|----------------|--------------------|---------------|-------------|------------|-------------|----------------|
| 1              | MSH2-L             | Male          | Black       | 8.4        | Standard    | T              |
| 2              | MSH2-L             | Male          | Black       | 7.8        | High        | T              |
| 3              | MSH2-H             | Male          | Black       | 15.2       | Standard    | T              |
| 4              | MSH2-L             | Male          | White       | 5.7        | Standard    | B              |
| 5              | MSH2-H             | Male          | White       | 6.2        | Low         | B              |
| 6              | MSH2-L             | Male          | White       | 5.4        | Low         | B              |
| 7              | MSH2-H             | Male          | White       | 4.2        | Standard    | B              |
| 8              | MSH2-L             | Male          | Black       | 11.1       | Standard    | B              |
| 9              | MSH2-H             | Male          | Black       | 11.1       | Standard    | B              |
| 10             | MSH2-L             | Female        | Black       | 11.6       | Low         | B              |
| 11             | MSH2-H             | Female        | Black       | 12.9       | Low         | B              |

**Table 3.** Microsatellite instability results.

| Patient | MSH2 status | Bat25 | Bat26 | NR21 | NR22 | NR24 | positive/total loci |
|---------|-------------|-------|-------|------|------|------|---------------------|
| 1       | MSH2-L      | no    | no    | yes  | yes  | no   | 2/5                 |
| 2       | MSH2-L      | no    | no    | yes  | no   | yes  | 2/5                 |
| 3       | MSH2-H      | no    | no    | yes  | yes  | no   | 2/5                 |
| 4       | MSH2-L      | yes   | yes   | yes  | yes  | yes  | 5/5                 |
| 5       | MSH2-H      | yes   | no    | no   | no   | yes  | 2/5                 |
| 6       | MSH2-L      | yes   | no    | yes  | no   | no   | 2/5                 |
| 7       | MSH2-H      | no    | no    | no   | no   | no   | 0/5                 |
| 8       | MSH2-L      | yes   | yes   | yes  | yes  | yes  | 5/5                 |
| 9       | MSH2-H      | yes   | no    | no   | no   | no   | 1/5                 |
| 10      | MSH2-L      | yes   | no    | no   | no   | no   | 1/5                 |
| 11      | MSH2-H      | yes   | no    | no   | yes  | no   | 2/5                 |

**Table 4.** Sensitivity of human leukemia cells (CEM) after shRNA knockdown of each gene listed. Control = CEM with control vector (SHC002V ).

The drug concentration required for 50% cytotoxicity (IC<sub>50</sub>) was measured by the MTT assay.

| Drug      | Knockdown      | IC <sub>50</sub> | p-value  | Percent of control |
|-----------|----------------|------------------|----------|--------------------|
| 6-MP      | Control        | 0.89             |          |                    |
|           | <i>FRAP1</i>   | 4.85             | 0.012    | 545                |
|           | <i>HERC1</i>   | 42.52            | <0.00001 | 4777               |
|           | <i>PIK3C2B</i> | 4.85             | <0.00001 | 545                |
|           | <i>PRKCZ</i>   | 10.97            | <0.00001 | 1233               |
| 6-TG      | Control        | 0.34             |          |                    |
|           | <i>FRAP1</i>   | 2.39             | <0.00001 | 703                |
|           | <i>HERC1</i>   | 1.84             | <0.00001 | 541                |
|           | <i>PIK3C2B</i> | 1.26             | <0.00001 | 371                |
|           | <i>PRKCZ</i>   | 0.81             | <0.00001 | 238                |
| Melphalan | Control        | 3.35             |          |                    |
|           | <i>FRAP1</i>   | 2.39             | <0.00001 | 56                 |
|           | <i>HERC1</i>   | 1.84             | <0.00001 | 68                 |
|           | <i>PIK3C2B</i> | 1.65             | <0.00001 | 49                 |
|           | <i>PRKCZ</i>   | 1.00             | <0.00001 | 30                 |

**Table 5.** Comparison of clinical and biological features in MSH2-L and MSH2-H cases of ALL in both cohorts.

| group                                      | MSH2    | number | mean | max   | median | range | Exact Wilcoxon rank test p value |
|--------------------------------------------|---------|--------|------|-------|--------|-------|----------------------------------|
| AGE at Diagnosis                           | MSH2-H  | 81     | 6.4  | 18.0  | 4.9500 | 16.5  | 0.3408                           |
|                                            | MSH2-L  | 16     | 7.2  | 16.4  | 6.2    | 13.8  |                                  |
| WBC at Diagnosis<br>(x 10 <sup>9</sup> /L) | MSH2 -H | 81     | 66.2 | 392.0 | 32.3   | 391.2 | 0.0046                           |
|                                            | MSH2-L  | 16     | 30.8 | 309.0 | 6.05   | 306.8 |                                  |

| Clinical Features     |                          |                                         | MSH2       |            | Exact Chi-square Tests |
|-----------------------|--------------------------|-----------------------------------------|------------|------------|------------------------|
| Loci                  | Clinical Features        | Total Number of Patients in Each Groups | MSH2-L (%) | MSH2-H (%) | Two-sides P Values     |
| SEX                   | Male                     | 62 ( 63.9)                              | 12 ( 19.4) | 50 ( 80.6) | 0.3999                 |
|                       | Female                   | 34 ( 35.4)                              | 4 ( 11.8)  | 30 ( 88.2) |                        |
| RACE                  | White                    | 74 ( 76.3)                              | 10 ( 13.5) | 64 ( 86.5) | 0.2015                 |
|                       | Black                    | 18 ( 18.6)                              | 5 ( 27.8)  | 13 ( 72.2) |                        |
|                       | Other                    | 5 ( 5.2)                                | 1 ( 20.0)  | 4 ( 80.0)  |                        |
| ALL Lineage           | B-lineage                | 78 ( 80.4)                              | 13 ( 16.7) | 65 ( 83.3) | 1.0000                 |
|                       | T lineage                | 19 ( 19.6)                              | 3 ( 15.8)  | 16 ( 84.2) |                        |
| B lineage ALL subtype | BCRABL                   | 2 ( 2.6)                                | 0 ( 0.0)   | 2 ( 100.0) | 0.9768                 |
|                       | E2APBX, t(1;19)          | 5 ( 6.4)                                | 1 ( 20.0)  | 4 ( 80.0)  |                        |
|                       | TELAML1                  | 23 ( 29.5)                              | 3 ( 13.0)  | 20 ( 87.0) |                        |
|                       | Hyperdiploidy 50 or more | 17 ( 21.8)                              | 3 ( 17.6)  | 14 ( 82.4) |                        |
|                       | B others                 | 31 ( 39.7)                              | 6 ( 19.4)  | 25 ( 80.6) |                        |

**Table 6.** Copy number changes (deletions) of *FRAP1*, *HERC1*, *PRKCZ* and *PIK3C2B* in patients with sporadic colon cancer.

In the colorectal dataset, the analysis of 104 cases and corresponding germline DNA using the Affy 250k STY SNP Ship showed that 14 of 104 cases (13.5%) had deletions of one or more of these four genes (4 *FRAP1* only, 7 *HERC1* only, 1 *FRAP1+PRKCZ*, 1 *FRAP1+PRKCZ+HERC1* and 0 *PIK3C2B*). Three were focal deletions and 11 were large chromosomal deletions. Analysis was performed on the publicly available dataset (<http://research3.dfc.harvard.edu/cdk8colon/index.php?dir=Firestein%20et%20al/>)

| Genes          | Chromosome | Patient with focal deletion                                                                                                                                   | Patient with large deletion                                                                                                                                                                                                                                                                                                                                              |
|----------------|------------|---------------------------------------------------------------------------------------------------------------------------------------------------------------|--------------------------------------------------------------------------------------------------------------------------------------------------------------------------------------------------------------------------------------------------------------------------------------------------------------------------------------------------------------------------|
| <i>HERC1</i>   | Chr15      | 3 cases:<br>PRAWN_p_Sty26_Mapping<br>250K_Sty_D08_95216<br><br>SIDES_p_Sty16_Mapping<br>250K_Sty_D03_76242<br><br>WHELK_p_Sty27_Mapping<br>250K_Sty_E12_97010 | 5 cases:<br>CHAMS_p_Sty31_(CO124089)_Mapping<br>250K_Sty_G02_112344<br><br>BARRE_p_Sty10_Mapping<br>250K_Sty_H06_56526<br><br>SIDES_p_Sty16_Mapping<br>250K_Sty_B09_76334<br><br>WHELK_p_Sty27_Mapping<br>250K_Sty_E10_96978<br><br>WHELK_p_Sty27_Mapping<br>250K_Sty_H12_97016                                                                                          |
| <i>FRAP1</i>   | Chr1       | 0 case                                                                                                                                                        | 6 cases:<br>CHAMS_p_Sty31_(CO124089)_Mapping<br>250K_Sty_A06_112396<br><br>CHAMS_p_Sty31_(CO124089)_Mapping<br>250K_Sty_E07_112420<br><br>BARRE_p_Sty10_Mapping<br>250K_Sty_A06_56512<br><br>BARRE_p_Sty10_Mapping<br>250K_Sty_G02_56460<br><br>KNACK_p_Sty28_(C0-106345)_Mapping<br>250K_Sty_C07_104664<br><br>SPICA_p_Sty32_(CO-166838)_Mapping<br>250K_Sty_A05_121568 |
| <i>PRKCZ</i>   | Chr1       | 0 case                                                                                                                                                        | 2 cases:<br>CHAMS_p_Sty31_(CO124089)_Mapping<br>250K_Sty_E07_112420<br><br>CHAMS_p_Sty31_(CO124089)_Mapping<br>250K_Sty_A06_112396                                                                                                                                                                                                                                       |
| <i>PIK3C2B</i> | Chr1       | 0 case                                                                                                                                                        | 0 case                                                                                                                                                                                                                                                                                                                                                                   |

**Table 7.** Copy number changes (deletions) of *FRAP1*, *HERC1*, *PRKCZ* and *PIK3C2B* in adult

ALL patients.

The analysis of 45 adult ALL samples using the Affy 500k chip showed deletions of one or more of these 4 genes in 7 of 45 cases (16%). One had deletions of *FRAP1*, *HERC1*, *PRKCZ* and *PIK3C2B*, three had deletion of two genes (*FRAP1+HERC1*) and three had deletions of only one gene (2 *HERC1*, 1 *FRAP1*) Analysis was performed on the publicly available dataset (GSE9611)

| Genes          | Chromosome | Patient with focal deletion       | Patient with large deletion                                 |
|----------------|------------|-----------------------------------|-------------------------------------------------------------|
| <i>HERC1</i>   | Chr15      | 2 cases<br>GSM243089<br>GSM243099 | 4 cases<br>GSM243067<br>GSM243079<br>GSM243086<br>GSM243091 |
| <i>FRAP1</i>   | Chr1       | 1 case<br>GSM243089               | 4 cases<br>GSM243066<br>GSM243067<br>GSM243086<br>GSM243091 |
| <i>PRKCZ</i>   | Chr1       | 0 case                            | 1 cases<br>GSM243091                                        |
| <i>PIK3C2B</i> | Chr1       | 0 case                            | 1 cases<br>GSM243091                                        |

**Table 8.** Primers and Fluorescent Markers used for the MSI genotyping.

| Name   | Gene                               | Genbank number | Length and Location of the repeat | Fluorescent marker | Primer sequence 5' to 3'                                         | Average PCR product size bp |
|--------|------------------------------------|----------------|-----------------------------------|--------------------|------------------------------------------------------------------|-----------------------------|
| BAT-26 | hMSH2                              | U41210         | 26(A)<br>Intron 5                 | FAM                | tgactacttttgacttcagcc<br>aaccattcaacattttaacc <sup>a</sup>       | 120                         |
| BAT-25 | c-kit                              | L04143         | 25(T)<br>Intron 16                | Cy3                | tgcctccaagaatgtaagt <sup>a</sup><br>tctgcattttaactatggctc        | 124                         |
| NR-21  | SLC7A8                             | XM_033393      | 21(T)<br>5' UTR                   | HEX                | taaatgtatgtctcccctgg<br>attcctactccgcattcaca <sup>a</sup>        | 103                         |
| NR-22  | Transmembrane Precursor protein B5 | L38961         | 22(T)<br>3' UTR                   | FAM                | gaggcttgcaaggacataa<br>aattcggatgcatccagtt <sup>a</sup>          | 142                         |
| NR-24  | Zinc finger2 (ZNF-2)               | X60152         | 24(T)<br>3' UTR                   | HEX                | ccattgctgaatttacctc<br>attgtgccattgcattgattc<br>caa <sup>a</sup> | 132                         |

<sup>a</sup>Fluorescent primer



## Supplementary Methods

**Western blot analysis.** Western blot analysis was performed as previously described<sup>1</sup>. Briefly,  $1 \times 10^6$  leukemia cells were collected from the bone marrow of each patient before treatment. The human pre-B leukemia cell lines 697 and NALM-6 (German Collection of Microorganisms and Cell Cultures [DSMZ], Braunschweig, Germany) were used as MSH2 positive and negative controls, respectively. Cell lysates from ~1 million ALL cells were separated by electrophoresis on a 12% SDS-polyacrylamide gel, and the proteins were then electroblotted onto a Hybond P PVDF membrane. Protein expression was analyzed using the following antibodies: antibody to human MSH2 (Ab-2; Oncogene Science, Cambridge, MA), and antibody to GAPDH (Chemicon, Temecula, CA). Bands were visualized and quantified by PhosphorImager with the ImageQuaNT<sup>®</sup> software system (GE Healthcare Life Sciences), using blue fluorescence/chemifluorescence at 488 nm excitation. The amount of MSH2 protein in each leukemia sample was quantified based on the ratio of MSH2 protein signal to GAPDH signal from the same sample, expressed as relative units (RU). The estimated limit of detection of MSH2 protein was ~2ng/1 million ALL cells, corresponding to < ~6 RU%.

**Validation Cohort.** To validate our findings in an independent cohort of patients with ALL, we performed the same CNA analysis of leukemia cell DNA from an additional 170 patients treated on the St Jude Total XV Protocol, to identify cases in which one or more of these 4 genes (*FRAP1*, *HERC1*, *PIK3C2B*, *PRKCZ*) were deleted. We then performed western blot analysis to determine MSH2 protein levels in all cases with deletions for whom a sufficient quantity of ALL

cells was available for analysis, and in cases that did not have evidence of these gene deletions, matched (2:1) for ALL lineage, ploidy and molecular subtype.

**Quantitative RT-PCR.** Primers and probes (see below) for genomic quantitative PCR were designed using Primer Express 3.0 (Applied Biosystems, Foster City, CA) and Taqman® RNase P primers and probes (Applied Biosystem, Foster City, CA) were used for amplification control. 50 ng of leukemic blast DNA were amplified using a 7900HT Real-Time PCR system (Applied Biosystems, Foster City, CA) using the 7900 universal cycling conditions: 50 °C for 2 minutes, followed by 95 °C for 10 minutes, then 40 cycles of 95 °C for 1 minute and 60 °C for 1 minute. Standard curves for each gene were performed using normal human DNA. Assays were performed in duplicate. Copy number values were normalized by dividing the value obtained for every gene by the paired value obtained for RNase P for each sample. Cutoffs of 0.7 and 0.3 were used to identify hemizygous and homozygous deletions respectively<sup>2</sup>.

**Primers and Probes for Real-Time PCR.** Primers and probes used were: *FRAP1* Taqman Forward (5'-TCCAGACCCTGATCCAAACC-3'), *FRAP1* Taqman Reverse (5'-CCTTTACCTGTGCCAATTCTCCTA-3'), *FRAP1* Taqman probe (5'-AGGTGTGATCAATAATGTCCTGGCA-3'), *HERC1* Taqman Forward (5'-GACATGTGTTTGGTGTAAATAAAAAAGG-3'), *HERC1* Taqman Reverse (5'-TGCTTCTTGGTAACATTCCATACG-3'), *HERC1* Taqman probe (5'-TGCCATCATTGCCACTTGTAGCCAAA-3'), *PIK3C2B* Taqman Forward (5'-CCGACATAATGACAACATCATGCT-3'), *PIK3C2B* Taqman Reverse (5'-CCAGGAAGCGGCCAAAAT-3'), *PIK3C2B* Taqman probe (5'-ACCACTGGTCACATGTTCCACATT-3'), *PRKCZ* Taqman Forward (5'-

TTGGTTAATTATCAGCCCAGGAAT-3'), *PRKCZ* Taqman Reverse (5'-CCACCTGCCGTTTACTGTGA-3'),  
*PRKCZ* Taqman probe TGGGTAGGAATCCAGGCTGCTG-3')

**mRNA gene expression analysis.** Total RNA was extracted from a minimum of  $5 \times 10^6$  leukemia cells or normal leukocytes and purified in a solution of phenol-chloroform-isoamyl alcohol (25:24:1). RNA integrity was assessed as previously described<sup>3</sup>. RNA was hybridized to U133A GeneChip oligonucleotide microarrays, per the manufacturer's protocol (Affymetrix, Santa Clara, CA). These arrays contain 22,283 probe sets that include approximately 13,021 well-characterized human genes.

***MSH2* cDNA sequencing.** mRNA from leukemia cells of 3 *MSH2*-low and 3 *MSH2*-high patients was isolated and the *MSH2* cDNA was produced by reverse transcription and amplified by PCR. PCR products containing the entire coding region (3058 bp, from 36 bases 5' of translation start, to 217 bases 3' of termination) were cloned and sequenced using Big Dye<sup>®</sup> Terminator (v3.1) chemistry on an Applied Biosystems 3730XL DNA Analyzer. Eight clones from each patient were sequenced using 6 overlapping primer pairs. Every base was successfully sequenced in at least 5 clones from each patient. One published 3' non-coding SNP in *MSH2* (rs17225053) was found in 2 of the 6 patient samples in which the *MSH2* cDNA was sequenced (1 *MSH2*-L and 1 *MSH2*-H case), serving as an internal control for detection of DNA variations. Based on cDNA sequencing, with validation by sequencing of amplified DNA from the same leukemia cells, there were no sequence variants detected in the *MSH2* coding DNA of any of the 6 cases. Because *MSH2* mRNA levels were not lower in the *MSH2*-L cases, we did not assess the methylation status of

MSH2 in these cases.

**Genotyping.** Genomic DNA and RNA were extracted from leukemia cells by using TRI Reagent<sup>®</sup> (Molecular Research Center Inc, Cincinnati, OH). The 3' untranslated region (UTR) of MSH2 was amplified using 10 ng of genomic DNA and 1x AmpliTaqGold master mix (Applied Biosystems, Foster City, CA) with PCR conditions of initial denaturation at 95 °C for 10 min, 35 cycles of 95 °C for 15 s and 60 °C for 1 min, and a final extension at 72 °C for 7 min. The following primers were used for *MSH2* 3' UTR amplification and sequencing: MSH2E17f and MSH2E17r (see sequences below). 400 ng of total RNA isolated from ALL cells was reverse-transcribed using the SuperScript III<sup>™</sup> First-Strand Synthesis System (Invitrogen). The *PRKCZ* cDNA coding region was amplified using two sets of primers: PRKCZ-1f and PRKCZ-1r; or PRKCZ-2f and PRKCZ-2r. PCR amplification was performed according to the manufacturer's protocol using GC-RICH PCR system with an initial denaturation step at 95 °C for 3 min, followed by 40 cycles at an annealing temperature of 55 °C. *PRKCZ* mRNA transcripts variants were detected using a nested PCR method. First round PCR was performed using primers PRKCZ-1f and PRKCZ-4r with 40 amplification cycles at an annealing temperature of 55 °C. Second round PCR was performed using primers PRKCZ-3f and PRKCZ-3r with 40 cycles of amplification at an annealing temperature of 59 °C. Primer sequences are listed below.

**Genotyping.** The primers used for the genotyping were:

MSH2E17f (5'-ATATTGGGTGGGCTAATGTGGG-3'), MSH2E17r (5'-TCACTCGCAATGATCTCCATGG-5'), PRKCZ-1f (5'-GGAGTTCCGCGGAGTTGA-3'), PRKCZ-1r (5'-AAGTTGAGGGAGATGCAGAT-3'),

PRKCZ-2f (5'-AGTGGTGAAGAAAGAGCTGGTG-3'), PRKCZ-2r (5'-GCATATGCGGTGGTTAAGGAT-3'),  
PRKCZ-3f (5'-GGACATCTTCATCACCAGCGT-3'), PRKCZ-3r (5'-GCATATGCGGTGGTTAAGGAT-3'),  
PRKCZ-4r (5'-CTTGAAACCGCATGACAG-3')

**Gene deletions in adult ALL and colorectal cancer.** To assess the frequency of gene deletions in adult ALL, Affy 500k CEL files were downloaded from the NCBI GEO site (GSE9611). For colorectal cancer, Affy 250K STY CEL files were downloaded from the author's website: <http://research3.dfci.harvard.edu/cdk8colon/index.php?dir=Firestein%20et%20al/>.<sup>4</sup>

We used dChip with default settings to perform copy number analysis .

**Antibodies.** Primary antibodies were purchased for GAPDH, Phospho-PKCZ (Thr410), and PI3KC2 $\beta$  (16L9) (Santa Cruz Biotechnology), PKC $\zeta$  (Biosource), AKT and Phospho-AKT (Ser 473), P70S6 kinase and Phospho-P70S6 Kinase (Thr389), and mTOR (Cell Signaling Technology). HERC1 antibodies 363 and 410 were provided by Rosa, J. L and were described previously<sup>5</sup>. Polyclonal rabbit antibody to mouse IgG horseradish peroxidase, polyclonal Swine antibody to rabbit IgG horseradish peroxidase and polyclonal rabbit Antibody to Goat IgG horseradish peroxidase were purchased from Dako.

**In vitro sensitivity (MTT) assay.** We determined in vitro drug sensitivity of primary ALL cells and of CEM cell lines (wild-type or each knockdown cell line) for 6-mercaptopurine, 6-thioguanine, melphalan, daunorubicin, L-asparaginase, vincristine, dexamethasone and prednisolone using a modification of the MTT (3-[4,5-dimethylthiazol-2-yl]-2, 5-diphenyl-tetrazoliumbromide) assay

as we have described previously<sup>6</sup>. Briefly, cells in mid-log phase were exposed to serial dilutions of the different drugs and analyzed after three days of incubation. The concentration of drug required for 50% cell kill (IC50) was used as the measure of relative sensitivity to each medication.

**MSH2 protein stability.** CCRF-CEM cells were seeded in culture medium, and cycloheximide (Sigma-aldrich) dissolved in DMSO was added to the cells to a final concentration of 5 $\mu$ g ml<sup>-1</sup>. Cells were harvested at different time points (0–48h) after cycloheximide treatment and washed with PBS. Lysates were prepared in SDS cell lysis buffer. The samples were fractionated in 4–12% Nupage Bis-Tris gels and immunoblotted with MSH2 and GAPDH antibodies. Levels of MSH2 were quantified by densitometry and the optical density normalized to GAPDH signal was plotted. Each of the cases (control, rapamycin treatment and knockdowns) was normalized to its own y-intercept.

**Immunoprecipitation and detection of Ubiquitinated MSH2.** CCRF-CEM cells were treated or not with 300 nM of rapamycin for 48h. 24h before harvesting, 10 nM of MG132 was added to the cell culture. Cell lysis and immunoprecipitation were performed using the co-immunoprecipitation kit from Pierce. Mouse Antibody to human MSH2 (Ab-2; Oncogene Science, Cambridge, MA) and mouse antibody to IgG1 were covalently coupled onto an amine-reactive resin. After elution ubiquitinated MSH2 proteins were resolved by SDS-PAGE, transferred (transfert buffer: 25mM Tris, 190mM glycine, 20% methanol, pH adjusted to 8.0 and 0.05% SDS) to PVDF membranes. Blots were incubated with mouse antibody to ubiquitin

from BD Pharmingen.

**PP2A assay.** The PP2A assay was performed using the malachite green-based PP2A immunoprecipitation phosphatase assay kit (US Biological), following the manufacturer's protocol. Cells were incubated in an extraction buffer containing 20 mM imidazole-HCl, 2 mM EDTA, 2 mM EGTA, pH 7.0 with protease inhibitors and without phosphatase inhibitors. The cells were sonicated, and PP2A immunoprecipitations were performed using 100  $\mu$ g of proteins from the supernatants, 4  $\mu$ g of antibody to PP2A -catalytic subunit antibody and 25  $\mu$ l of protein A-agarose beads. After 2 hours incubation at 4 °C with constant rocking, beads were washed. The immunoprecipitates were resuspended in 20  $\mu$ l of Ser/Thr assay buffer. The reaction was initiated by the addition of 60  $\mu$ l of phosphopeptide substrate (K-R-p-T-I-R-R). After incubation for 10 min at 30 °C in a shaking incubator, the reaction mixture was centrifuged briefly and 25  $\mu$ l of the supernatant were transferred to a 96-well microtiter plate. The reaction was terminated by the addition of 100  $\mu$ l of malachite green phosphate detection solution for 10–15 min at room temperature, and free phosphate was quantified by measuring the absorbance at 650 nm with a microplate reader. The phosphatase activity was calculated using a phosphate standard curve. Values are means  $\pm$  SD of three determinations.

**In vitro MMR Assay.** MMR activity was analyzed using an *M13mp2* lacZ  $\alpha$  -complementation method as described previously<sup>7</sup>. The double-stranded M13mp2 heteroduplex DNA contains a nick in the (-) strand and a 2 base loop in the lacZ  $\alpha$  -complementation gene. The (+) strand encodes a colorless plaque phenotype, whereas the (-) strand encodes a blue plaque

phenotype. The repair was directed to the (-) strand of *M13mp2* by the presence of a nick. Introduction of this heteroduplex DNA into an *Escherichia coli* strain defective in mismatch repair yields M13 plaques on host indicator plates that are blue, colorless, or a mixture of the two. The repair reactions (25  $\mu$ l) contained 30 mM 4-(2-hydroxyethyl)-1-piperazine-ethanesulfonic acid (pH 7.8), 7 mM  $MgCl_2$ , 200  $\mu$ M each of CTP, GTP, 4 mM ATP, 100  $\mu$ M each of dATP, dGTP, dTTP, and dCTP, 40 mM creatine phosphate, 100 mg  $ml^{-1}$  creatine phosphokinase, 15 mM sodium phosphate, 5 ng of purified heteroduplex DNA, and 50  $\mu$ g of cellular extract. After incubation for 30 min at 37  $^{\circ}C$ , the DNA was introduced into *E. coli* NR9162 (*mutS* strain) by electroporation. The cells were plated to score plaque colors. As the nick directs repair to the (-) strand, the (+) phenotype increases and the (-) phenotype decreases, producing more colorless plaques in this instance. The repair efficiency was expressed in percentage, as  $100 \times (\text{ratio of mixed colonies in the control group} - \text{the ratio of mixed colonies in repaired group}) / (\text{ratio of mixed colonies in the control group})$ . The rescue experiments were performed by adding 0.2  $\mu$ g of MutS $\alpha$  in 25  $\mu$ l of reaction. Each experiment was repeated three times, and data represent the mean  $\pm$  S.D. of three separate determinations

**MutS $\alpha$  protein purification.** Human MutS $\alpha$  was purified in the Hsieh lab (NIH, NIDDK) from a baculovirus overexpression system essentially as described for the corresponding mouse MutS $\alpha$  protein<sup>8</sup>. ORFs derived from human cDNA clones encoding MSH2 and MSH6 (Open Biosystems Thermo Scientific #4110354 and #3629489, respectively) were cloned into pFB1 (Invitrogen), and baculovirus stocks were produced in Sf9 cells (Kinnakeet Biotechnology). High



Five cells (Invitrogen) were co-infected at an MOI of 10 and lysates prepared 48–72 hours post-infection. Recombinant hMutS $\alpha$  was purified by sequential passage over a 6-ml Resource Q column, a 5-ml Heparin HiTrap column and Hi-Prep 16/60 Sephacryl S-300 gel filtration (GE Healthcare). Protein concentrations were estimated using the Bio-Rad Bradford protein assay with bovine serum albumin as standard and are expressed as molar concentrations of heterodimeric protein.

**Sequences of shRNA used for the knockdown of *FRAP1*, *HERC1*, *PIK3C2B* and *PRKCZ* genes.**

For the knockdown the sequences of the shRNAs were:

CCGGGCATGGAAGAATACACCTGTA CTGAGTACAGGTGATTCTTCCATGCTTTTTG and  
CCGGCCGCTAGTAGGGAGGTTTATTCTCGAGAATAAACCTCCCTACTAGCGGTTTTTG for  
*FRAP1/MTOR*; CCGGGCCCAGAATATCACTGTCCTTCTCGAGAAGGACAGTGATATTCTGGGCTTTTT  
and CCGGGCCATTGAATATCGACTTCATCTCGAGATGAAGTCGATATTCAATGGCTTTTT for *HERC1*;  
CCGGCCTCTTGTCTTCCCTACTTTACTCGAGTAAAGTAGGGAAGACAAGAGGTTTTT and  
CCGGCCTCCACTGTAGACTTGCTTACTCGAGTAAGCAAGTCTACAGTGGAGGTTTTT for *PIK3C2B*;  
CCGGCATGAAAGTGGTGAAGAAAGACTCGAGTCTTTCTTCACTTTTCATGTTTTT and  
CCGGACCTAATCAGAGTCATCGGGCCTCGAGGCCGATGACTCTGATTAGGTTTTTTT for *PRKCZ*.

**Microsatellite Instability Analysis.** Genomic DNA from leukemia cells from 6 MSH2-L patients and from 5 MSH2-H patients (matched for ALL subtype) was amplified using quasi-monomorphic mononucleotide markers<sup>9,10</sup>. The 5 mononucleotide repeats were co-amplified in

1 multiplex PCR (primers, see Supplementary Table 8) using the True Allele PCR Premix kit from ABI PRISM. The pentaplex PCR was performed as described below:

1-Denaturation at 94 °C for five minutes

2-Denaturation at 94 °C for 30 seconds, annealing at 55 °C for 30 seconds Extension at 72 °C for 30 seconds 35 cycles

3-Extension at 72 °C for 7 minutes

Separation and detection of PCR products were performed on a 3730xL DNA Analyser (Applied Biosystems) following the manufacturer's protocol. GeneMapper 4.0 was used to calculate the size of each fluorescent PCR product.

## Supplementary References

1. Krynetskaia, N.F. *et al.* Msh2 deficiency attenuates but does not abolish thiopurine hematopoietic toxicity in msh2<sup>-/-</sup> mice. *Mol Pharmacol.* **64**, 456-465 (2003).
2. Mullighan, C.G. *et al.* Genome-wide analysis of genetic alterations in acute lymphoblastic leukaemia. *Nature* **446**, 758-764 (2007).
3. Cheek, M.H. *et al.* Treatment-specific changes in gene expression discriminate in vivo drug response in human leukemia cells. *Nat Genet.* **34**, 85-90 (2003).
4. Firestein, R. *et al.* CDK8 is a colorectal cancer oncogene that regulates beta-catenin activity. *Nature* **455**, 547-551 (2008).
5. Rosa, J.L., Casaroli-Marano, R.P., Buckler, A.J., Vilaró, S., Barbacid, M. p619, a giant protein related to the chromosome condensation regulator RCC1, stimulates guanine nucleotide exchange on ARF1 and Rab proteins. *EMBO J* **15**, 4262-4273 (1996).
6. Holleman, A. *et al.* Gene-expression patterns in drug-resistant acute lymphoblastic leukemia cells and response to treatment. *N. Engl. J. Med.* 2004; 351:533-542.
7. Thomas, D.C., Umar, A., Kunkel, T. A. Measurement of heteroduplex repair in human cell extracts. *Methods: A companion to Methods in Enzymology* **7**, 187-197 (1995).
8. Yoshioka, K., Yoshioka, Y., Hsieh, P. ATR kinase activation mediated by MutSalpha and MutLalpha in response to cytotoxic O6-methylguanine adducts. *Mol Cell* **22**, 501-510 (2006).
9. Suraweera, N. *et al.* Evaluation of tumor microsatellite instability using five quasimonomorphic mononucleotide repeats and pentaplex PCR. *Gastroenterology* **123**, 1804-1811 (2002).
10. Suraweera, N. *et al.* Evaluation of tumor microsatellite instability using five quasimonomorphic mononucleotide repeats and pentaplex PCR. *Gastroenterology* **123**, 1804-1811 (2002).
